# Supplementary material for: Use of Twitter to monitor attitudes toward depression and schizophrenia: an exploratory study
Source: PeerJ. 2014 Oct 28;2:e647. doi: 10.7717/peerj.647 (PMC4217192; doi:10.7717/peerj.647)
Supplement: Supplemental Information 1 [file peerj-02-647-s001.xlsx]

## Sheet: Instructions
Instructions for coding
1. Code each tweet for the following axes (See sheets named "Schizophrenia tweets 10%" and "Depression tweets 10%")
Content
Level of Stigma
2. For those tweets classified as “Stigmatising” or “Personal experience of stigma”, further code for type of stigma
3. Code users based on their username, name, and bio (See sheets named "Schizophrenia users 10%" and "Depression users 10%")
Coding definitions and example tweets
Theme	Definition	Representative #depression tweet	Representative #schizophrenia tweet
Content
Personal experience of mental illness	Describes personal experience with depression or schizophrenia as a consumer, or a friend or relative of someone with depression or schizophrenia.	#depression makes me feel like i'm constantly living a outer body experience when i'm on my own.	I was diagnosed with dementia praecox (#schizophrenia) 32 years ago. Sorry about my crazy tweets, I'm insane.
Awareness promotion	Promotes awareness of depression or schizophrenia by either 1) providing information 2) linking to information on a website (e.g., blog, news article, e-book, or YouTube video) or 3) encouraging discussion about depression or schizophrenia.	Are You Depressed? Signs and Symptoms of Depression in Women: http://t.co/h2YR0SYZdW #depression Please RT	Five myths – and the facts – about schizophrenia http://t.co/yr9WNrwR5r #Stigma #Schizophrenia #MentalHealth #1In4
Resources for consumers	Provides resources, advice, or support specifically for consumers or friends and relatives of someone with depression or schizophrenia; or encourages social networking between consumers.	RT @Daniel_L_Baker: If you're suffering from #depression or know someone who is, download my FREE e-book at http://t.co/oi3n2PobPL	6 tips for families dealing with #schizophrenia http://t.co/pIBFQGYTCs
News media	Describes and links to an online news story or article	Toronto woman denied entry to U.S. after agent cites history of #depression http://t.co/lHu9GPgRjl via @torontostar	@HuffingtonPost article on #Veterans battle with #schizophrenia http://t.co/sCQqA5EayQ
Advertising	Advertises a product or service for sale	#Frankincense - Deep in History - Treat many medical conditions - #Depression - #Anxiety #Cancer & more! #PleaseVisit http://t.co/Wlr1Q219iX	Haloperidol schizophrenia best #schizophrenia website licensed drug store . http://t.co/FJdLH56709 #rogers
Research findings	Describes the outcomes of a research study	#Depression in #pregnancy: New study shows preferences for #therapy over #medication http://t.co/XOzpgDNu00	Meta-analysis finds that mindfulness may help with the negative symptoms of #schizophrenia http://t.co/xRRNlgJ7wK #Mindfulness
Personal opinion	Describes an individual's personal opinion or view	I think this #generation has issues with #depression because everyone thinks about themselves too much. What happened to putting others 1st?	The Schofield's are a family that make me feel grateful for my daughter #January #schizophrenia
Attitude
Stigmatising*	Indicates a negative attitude towards people with depression/schizophrenia	Wanna know the secret of #depression? People only have it if they know they've become a fucking #loser, the rest is just an #excuse #stfu	Schizophrenia: Medicine's mystery - Societ's shame #schizophrenia http://t.co/BGIVJuSe2J
Personal experience of stigma*	Describes a personal experience of stigmatising attitudes or discrimination towards depression/schizophrenia	My husband suffered from #depression & #anxiety. I was amazed on how many said he should "just get over it." It's a disease, not a choice.	#Schizophrenia Sufferers' #Job Fears @BBCNews http://t.co/0ddhfVsvsI
Anti-stigma	Explicitly promotes the reduction of stigma towards people with depression/ schizophrenia	RT @Daniel_L_Baker: People can’t just “snap out of #depression”. It doesn’t work like that. If it did, don’t you think they would?	And if you think that people with #schizophrenia (like me) or other mental health conditions are "psycho" or dangerous, shame on you.
Supportive	Supportive towards people with depression/schizophrenia	It IS possible to recover from #depression. Never give up: http://t.co/sQ8Ihu0pkd	@SchizophreniaCa I support my son who has #schizophrenia. My husband supports me #love
Neutral	Indicates a neutral attitude towards people with depression/ schizophrenia	Our paper on prevalence of #depression and #BipolarDisorder within UK Biobank, just published @PLOSONE http://t.co/6nFj…	Symptoms of #schizophrenia are very common, raising questions about how distinct the diagnosis is. http://t.co/6yZSOto8dK #m…
*Type of Stigma
Social distance	Unwillingness to have social contact with people with depression/ schizophrenia	-	The Schofield's are a family that make me feel grateful for my daughter #January #schizophrenia
Dangerousness	Belief that people with depression/schizophrenia are dangerous	-	Untreated #Schizophrenia Boosts Likelihood of Future Violence Among Prisoners http://t.co/vWlmtU6CQd
Snap out of it	Belief that people with depression/schizophrenia could snap out of it	How low can a person go b4 I can scold the person to wake up get a job get a life? #depression #stubborn #pride preventing accepting help	-
Personal weakness	Belief that depression/schizophrenia is a sign of personal weakness	#depression is a crisis of confidence http://t.co/q3jumRiTZ9	-
Inaccurate beliefs	Indicates a lack of knowledge or inaccurate understanding of depression/schizophrenia is. E.g., That schizophrenia refers to having multiple personalities.	-	Btw, Katie is my other personality #schizophrenia
Mocking or trivialising	Rude, derogotary, or trivialising towards people with depression /schizophrenia	Tyson: To get rid of depression you sit in a cupboard and pee your pants! Creager: Noooooooo! #depression	@richardrainey you realize that it looks like we are having a twitter conversation with ourselves. #schizophrenia
Self stigma	Indicates that the consumer has internalised a stigmatising attitude towards people with depression/schizophrenia	Wish it wasn't so hard to ask for help #depression #wordsiwillneversay #Truth	-

## Sheet: Schizophrenia tweets 10%
Tweet ID	Username	Tweet	Date	Tweet or Retweet	Number of retweets	Hashtags	Mentions	User	Bio	Location	URL
406000452976001024	jonginyegai	1929:Disney's Mickey Mouse short Jungle Rhythm,directed by Walt Living with #schizophrenia can be really hard, find out	28/11/2013 9:03:45 PM	Tweet	0	schizophrenia		Kenneth Anderson	CTO of Unified Marketing Agency @Definition6, husband, dad, geek, Views expressed are my own,	Farmington, United States
407031977355644928	NeuroBooks	Do you or someone you love have a story about living with #schizophrenia you'd like to share? http://t.co/k8xnMdpa9i	1/12/2013 5:22:40 PM	Tweet	0	schizophrenia		Vrinda Pendred	CONDITIONAL PUBLICATIONS: Books by and about people with neurological disorders: OCD, Tourette's, ADD, Autism, Bipolar, Epilepsy, Schizophrenia, Anxiety.	Hertfordshire, UK	http://t.co/ZszcT0yZa5
406501911157035008	Daniel_L_Baker	If you care about what other people think you will always be their prisoner. #mentalhealth #depression #anxiety #bipolar #schizophrenia	30/11/2013 6:16:22 AM	Tweet	3	mentalhealth depression anxiety bipolar schizophrenia		Danny Baker	Author and founder of the Depression Is Not Destiny Campaign. Get your FREE copy of my tell-all memoir, The Danny Baker Story, at my website today.	Sydney, Australia	http://t.co/oi3n2PobPL
407560333620813824	ColumbiaOCD	Zoological research methods used to differentiate #schizoOCD from #OCD and #schizophrenia. http://t.co/z0iYwLlt5U	3/12/2013 4:22:10 AM	Tweet	0	schizoOCD OCD schizophrenia		Columbia OCD	Our mission is to improve the lives of those with obsessive-compulsive disorder by conducting cutting-edge research. http://t.co/uylYrmflu9	New York, NY	http://t.co/Booaq3axkn
405235099412623360	DymphnaRose	@candacecbure PLEASE WATCH this short film featuring @jonathanlooper as young #Veteran battles #schizophrenia http://t.co/qADNpXcxe9 …THANKS	26/11/2013 6:22:31 PM	Tweet	0	Veteran schizophrenia	candacecbure jonathanlooper	Linda O'Dell	Learning Life's a Journey, always trying 2B closer2 God. I love learning 2B Catholic, being RN, Family, Pets, #ArmyWives, Reading, Crocheting, wanna-B quilter!	Arkansas
406082162266738688	CAMHResearch	RT @CAMHResearch: Family members of youth ages 16-29, diagnosed with #schizophrenia or #depression - consider SSO-CAMH study. Call 416.449.…	29/11/2013 2:28:26 AM	Retweet	1	schizophrenia depression	CAMHResearch	CAMH Research	CAMH is Canada's leading mental health and addictions research centre. Tweeting on new studies, latest discoveries.	Toronto, ON, Canada	http://t.co/N9N6CInHAW
407399727479930880	PsychLaw	RT @PsychLaw: Untreated #Schizophrenia Raises #Risk of #Violence, Study Finds http://t.co/GSwcPgl05g #psychosis #criminal #crime #assault #…	2/12/2013 5:43:58 PM	Retweet	2	Schizophrenia Risk Violence psychosis criminal crime assault	PsychLaw	Psychiatry & the Law	FORENSIC PSYCHIATRY NEWS. Criminal, civil, correctional, public policy—anything involving the interface between mental health and the law.		http://t.co/vzHv25znHD
405917939238334464	BenjaminDMiller	@UN To Ban Restraint and Seclusion in Mental Health Care: My Battle With #Schizophrenia - http://t.co/y0F2Q4XDBi | http://t.co/a30qLQsg3g	28/11/2013 3:35:52 PM	Tweet	0	Schizophrenia	UN	Ben Miller	COO of #PsychologyTomorrow @Psych2morrowmag, Explorer at the intersection of #art and #psychology... | http://t.co/q3mLIwZWcW | http://t.co/U3eeNH0zUp |		http://t.co/PmDdusRFxF
406307329370357760	Daniel_L_Baker	RT @Daniel_L_Baker: Stand up to the #mentalhealth stigma: http://t.co/Nz0WpGgspc #Depression #Bipolar #Schizophrenia #Anxiety #PTSD	29/11/2013 5:23:10 PM	Retweet	4	mentalhealth Depression Bipolar Schizophrenia Anxiety PTSD	Daniel_L_Baker	Danny Baker	Author and founder of the Depression Is Not Destiny Campaign. Get your FREE copy of my tell-all memoir, The Danny Baker Story, at my website today.	Sydney, Australia	http://t.co/oi3n2PobPL
405570235262337024	sycekuhak	Schizophrenia is #schizophrenia a mental illness due to disturbances in http://t.co/7sCTTNm07F	27/11/2013 4:34:13 PM	Tweet	0	schizophrenia		sycekuhak	Victory can only be enjoyed when you have experienced some level of defeat.	Memphis
406239750631485440	ukschizophrenic	RT @ukschizophrenic: #SchizoTribe!I have found a brave new member to the twitter #Schizophrenia family. Please everyone welcome @brora51. *…	29/11/2013 12:54:38 PM	Retweet	3	SchizoTribe Schizophrenia	ukschizophrenic brora51	TheSchizoPodcaster	Schizophrenic: Recovered Addict, former Sex Worker & Street Sleeper. A Gutter philosopher who LOVES toast! 28, Gay. Tweets in English & Welsh. #SchizoTribe	Homeless in London (UK)	http://t.co/jnXP29bzi7
406490671835803648	syzapazucez	The key to the treatment #schizophrenia of bipolar disorder (whether http://t.co/BEa0IUDjSQ	30/11/2013 5:31:43 AM	Tweet	0	schizophrenia		Nathaly Mendoza		Gainesville
405233183995596800	DymphnaRose	@foxandfriends PLEASE WATCH this short film featuring @jonathanlooper as young #Veteran battles with #schizophrenia http://t.co/qADNpXcxe9 …	26/11/2013 6:14:54 PM	Tweet	0	Veteran schizophrenia	foxandfriends jonathanlooper	Linda O'Dell	Learning Life's a Journey, always trying 2B closer2 God. I love learning 2B Catholic, being RN, Family, Pets, #ArmyWives, Reading, Crocheting, wanna-B quilter!	Arkansas
407522901584535553	AC_Elo	Symptoms of #schizophrenia, manic depression we have a problem here?	3/12/2013 1:53:25 AM	Tweet	0	schizophrenia		\m/Elo♠Ace\m/	Single 4 the Kingle. a.k.a Clarence. Einaudi. UoW. Gam3R. I ♥ Sheffield. MathPhy$!c$. MechEngr CADD. Tea/Coffee ♥. $0lv3r! Dignitas. Industrias. Unitas	Drag0n$th0rpe Man0r	http://t.co/kJTJ4HfzI9
405813066622705664	upelejika	Paliperidone is commonly known by #schizophrenia the brand name http://t.co/IMENjZKUQ0	28/11/2013 8:39:09 AM	Tweet	0	schizophrenia		upelejika		Coventry
406908527891189760	Leebgw	@seniorchuffy @dROP2RIPPLE @andrewnorthcbc people with SMI left out shows that there's little engagement w/people with #Schizophrenia here	1/12/2013 9:12:07 AM	Tweet	1	Schizophrenia	seniorchuffy dROP2RIPPLE andrewnorthcbc	Lee way	Lives with mental health impairment, carer and Chair of DROP (Disabled Responsible Organised People). Views are my own.	Gloucestershire
406436806561767424	N_Goodfellow	Evidence of protective mutation in #schizophrenia http://t.co/kMWIcBjB0z #mentalhealth #research	30/11/2013 1:57:40 AM	Tweet	0	schizophrenia mentalhealth research		Nathalie Goodfellow	Neuroscientist interested in the intersects between science, business and society.	Toronto
405721642930020352	ChristinaBruni	RT @ChristinaBruni: Recovery Strategies: Establishing a Tradition - Relationships - #schizophrenia http://t.co/GxNUKWYhAf via @HealthCentral	28/11/2013 2:35:52 AM	Retweet	1	schizophrenia	ChristinaBruni healthcentral	Christina Bruni	Mental Health Activist Freelance Journalist, Author of Left of the Dial and Live Life Well, books to be published shortly.	New York City	http://t.co/tjuARpQJcX
406698621145321472	BCSchizophrenia	Other Mental Health Organizations - Provincial Organizations / BC Partners for Mental... http://t.co/iUbsUvRZ4R #bcss #schizophrenia	30/11/2013 7:18:02 PM	Tweet	0	bcss schizophrenia		BC Schizophrenia Soc	The British Columbia Schizophrenia Society ( BCSS ) Helps people with schizophrenia & their families	Richmond, BC	http://t.co/gA8zg7kwzs
407484694901444608	SempleSemple	Interesting article by @EricaCamus about #schizophrenia + pregnancy, and her dilemma about having kids http://t.co/KgfJ7GObhi	2/12/2013 11:21:36 PM	Tweet	0	schizophrenia	EricaCamus	Brian Rethink	Senior media officer at Rethink Mental Illness...play in a band called Aretes http://t.co/7gzgVcCW0W...views my own
407536109024194560	MHTuz	RT @MHTuz: Immune system may play crucial role in #mentalhealth http://t.co/9fK1UxoaZx #schizophrenia #bipolar #depression http://t.co/RnBp…	3/12/2013 2:45:54 AM	Retweet	6	mentalhealth schizophrenia bipolar depression	MHTuz	#MentalHealth	Latest news about #MentalHealth.
405026060065968128	OCResearchTrial	Exciting new #Schizophrenia #Research leads to Discovery of the First Genetic Protective Factor for the disease http://t.co/QrIVIP7SDi	26/11/2013 4:31:52 AM	Tweet	0	Schizophrenia Research		OC Research Trials	We perform the utmost quality conduct of clinical research for our patients in order to advance safe and effective therapeutics to the marketplace.	Orange, CA	http://t.co/ply3RKX9BI
406539861559353345	JunoJakob	RT @JunoJakob: @smosier http://t.co/UYCjRWJet9 please share my kick-starter. A doc about #schizophrenia by a schizophrenic.	30/11/2013 8:47:10 AM	Retweet	1	schizophrenia	JunoJakob smosier	Juno Jakob	Film Watcher / Film Producer at 'Straw Lane Productions' ( Slaughter / No Direction Home / People Call Me Crazy) / Paranoid Schizophrenic	Bournemouth	http://t.co/qy0BHODa2t
406575948797313025	RavineshKumar	RT @RavineshKumar: #Polygenic dissection of diagnosis and clinical dimensions of #bipolar disorder and #schizophrenia. http://t.co/SdcDzz8k…	30/11/2013 11:10:34 AM	Retweet	3	Polygenic bipolar schizophrenia	RavineshKumar	Ravinesh A. Kumar	Research Director @ConteChicago, autism/schizophrenia/conduct disorder genomicist, GxE, Board Member @AACTIONAutism, amateur photographer, Vancouverite	Chicago, IL	http://t.co/L4ePVWv9hb
405059558919643136	vinylarm	Five myths – and the facts – about schizophrenia http://t.co/yr9WNrwR5r #Stigma #Schizophrenia #MentalHealth #1In4	26/11/2013 6:44:59 AM	Tweet	1	Stigma Schizophrenia MentalHealth 1In4		Lloyd Armstrong	Mental Health Nurse / Elected Staff Governor / Royal College Of Nursing Activist / Keen Advocate of Social Inclusion / Army Veteran US & GB	Essex	http://t.co/mBwBvaMrex
405627375943049217	ChristinaBruni	Recovery Strategies: Establishing a Tradition - Relationships - #schizophrenia http://t.co/GxNUKWYhAf via @HealthCentral	27/11/2013 8:21:17 PM	Tweet	1	schizophrenia	healthcentral	Christina Bruni	Mental Health Activist Freelance Journalist, Author of Left of the Dial and Live Life Well, books to be published shortly.	New York City	http://t.co/tjuARpQJcX
406869517370138624	JimmyCouplet	Though I'm lowly I feel happy and whole when The Holy Spirit speaks to my soul. :) #schizophrenia	1/12/2013 6:37:06 AM	Tweet	0	schizophrenia		Jim Wilson	I enjoy writing rhymes in the genre of literary nonsense, Edward Lear and Lewis Carroll are experts in this genre. :) http://t.co/SuyuUoUTwA	Aberdeen, Scotland, UK.	http://t.co/8RsS6Zf2Bj
405859413963333632	celineypie	@lauricekrkby you can do it!!!! #brains #schizophrenia #memorysucks #essays	28/11/2013 11:43:19 AM	Tweet	0	brains schizophrenia memorysucks essays	lauricekrkby	Celine	Single black female addicted to retail	Toronto, Ontario
405387745520283648	qulopybyme	What is another name for haloperidol ChaCha #schizophrenia Answer: http://t.co/qWtP4itsQS #followpyramid	27/11/2013 4:29:04 AM	Tweet	3	schizophrenia followpyramid		qulopybyme	Running away from your problems is a race you’ll never win.	Milwaukee
405923062308405248	kevinjmac17	RT @kevinjmac17: Most assume too quickly, judge inconsiderately, and understand inadequately. http://t.co/tp0xG9ZYXc #Schizophrenia #NotSoU…	28/11/2013 3:56:14 PM	Retweet	1	Schizophrenia NotSoU	kevinjmac17	Kevin MacDonald
405132007807541248	SchizophreniaRI	#GivingTuesday happens Dec 3.Help us find better treatments & a cure for #schizophrenia. http://t.co/spe2giSGdO http://t.co/3qnIrMr4tk	26/11/2013 11:32:52 AM	Tweet	1	GivingTuesday schizophrenia		SchizophreniaRI	Schizophrenia Research Institute: discovering ways to understand, better treat, prevent and cure schizophrenia. A Follow or RT does not imply endorsement.	Australia wide	http://t.co/YmrjDzWF5g
406047472981520384	agteien	Treating schizophrenia without drugs? There's good evidence for it. http://t.co/bk1HmmKe8l via @MickBramham #ethics #schizophrenia #MH	29/11/2013 12:10:36 AM	Tweet	1	ethics schizophrenia MH	MickBramham	Anne Grethe Teien	MA in dance studies. Negative user experiences from psychiatry. Interested in good dialogue on how to improve mental health services. Norwegian/English	Norway	http://t.co/6XAh5Z7ZG5
405230825546842112	DymphnaRose	@TwoGems57 PLZ WATCH short film featuring @janbroberg & @jonathanlooper on young #Veteran's battle w #schizophrenia http://t.co/qADNpXcxe9 …	26/11/2013 6:05:32 PM	Tweet	0	Veteran schizophrenia	TwoGems57 janbroberg jonathanlooper	Linda O'Dell	Learning Life's a Journey, always trying 2B closer2 God. I love learning 2B Catholic, being RN, Family, Pets, #ArmyWives, Reading, Crocheting, wanna-B quilter!	Arkansas
405901080506433536	axilovadp	Get advice #schizophrenia and support on how to Conquer my Generalized http://t.co/EUGZfFANH4 #youareamumbaikarwhen	28/11/2013 2:28:53 PM	Tweet	0	schizophrenia youareamumbaikarwhen		axilovadp	You make me crazy, you make me wild. Just like a baby, you spin me 'round like a child.	Arlington
405630774621507584	MHRUKCharity	RT @MHRUKCharity: 3 new studies show similar #brain abnormalities in #bipolar & #schizophrenia &amp; in non-suffering relatives: http://t.co/tH…	27/11/2013 8:34:47 PM	Retweet	3	brain bipolar schizophrenia	MHRUKCharity	MHRUK	The 1st UK charity dedicated to funding research into mental illness causes to develop better treatments/cures & make a long-term difference	UK	http://t.co/H1tMsP42Dk
405369579221684224	BCSchizophrenia	Psychosis Symptoms and What to Do - Printable Version: Psychosis Symptoms and What to Do... http://t.co/uthxFRruoc #bcss #schizophrenia	27/11/2013 3:16:53 AM	Tweet	0	bcss schizophrenia		BC Schizophrenia Soc	The British Columbia Schizophrenia Society ( BCSS ) Helps people with schizophrenia & their families	Richmond, BC	http://t.co/gA8zg7kwzs
407533618094157824	DGlassHalfFull	she smokes a pack a day, oh no wait that's me but anyways #meetvirginia #schizophrenia #iamvirginia	3/12/2013 2:36:00 AM	Tweet	0	meetvirginia schizophrenia iamvirginia		Daniel Glass	As an openly bromo-sexual you should know that I'm a force to be reckoned with, I reckon	Fort Kickass
405903938408292352	covohusyn	In rare #schizophrenia cases, the following symptoms were reported during http://t.co/is0mn5K4ZT	28/11/2013 2:40:14 PM	Tweet	0	schizophrenia		covohusyn		Coventry
405439248137859072	qulopybyme	RT @qulopybyme: What is another name for haloperidol ChaCha #schizophrenia Answer: http://t.co/qWtP4itsQS #followpyramid	27/11/2013 7:53:44 AM	Retweet	3	schizophrenia followpyramid	qulopybyme	qulopybyme	Running away from your problems is a race you’ll never win.	Milwaukee
405769644645961728	ResearchAtCRI	MT -New studies show similar #brain abnormalities in #bipolar & #schizophrenia &amp; in non-suffering relatives #ShowMeTheFacts via MHRUKCharity	28/11/2013 5:46:36 AM	Tweet	2	brain bipolar schizophrenia ShowMeTheFacts		CRI	Centerstone Research Institute (CRI) is dedicated to improving the quality and effectiveness of mental health care through research, evaluation and analytics.	Bloomington and Nashville	http://t.co/lRC1gxagg0
405654435554013184	ManchesterMind	Health and Social Care Act - 'There isn't profit in #schizophrenia ... so nobody's going to look after them' http://t.co/udEnQCMtGB	27/11/2013 10:08:48 PM	Tweet	0	schizophrenia		Manchester Mind	Promoting good mental health through support, advice and wellbeing projects. Also catering #SocEnt http://t.co/FAs18l534g Our new blog: http://t.co/mZb1HRQMCA	Manchester	http://t.co/z474vKVXMF
405779561905803265	cmhahkpr	RT @cmhahkpr: Check out this powerful PSA from @CAMHnews #mentalhealth #schizophrenia #stigma http://t.co/KALHxe4aTq	28/11/2013 6:26:01 AM	Retweet	6	mentalhealth schizophrenia stigma	cmhahkpr CAMHnews	CMHA-HKPR	CMHA Haliburton, Kawartha, Pine Ridge Branch -Serving the counties of Peterborough, Haliburton, Northumberland, City of Kawartha Lakes and the Township of Brock	Peterborough, Ontario	http://t.co/bvmrZ1a0i1
407427520527892480	artautism	RT @artautism: 19th Birthday in a psychiatric hospital isn't fun dual diagnosis #autism #schizophrenia http://t.co/KtW43vFnYV	2/12/2013 7:34:25 PM	Retweet	7	autism schizophrenia	artautism	The Art of #Autism	Debra Hosseini storyteller, art curator and blogger on autism, #Aspergers, #neurodiversity, #creativity and the power of the human spirit	Carpinteria, CA	http://t.co/Ff1zx3AnFp
406219428477829121	josipbrotz	HEAVY #Cannabis USE SLIGHTLY INCREASE (hikes?) #schizophrenia risk. #MAYBE #1037 http://t.co/hz7ZkVnXTn @ReGenUC @julianbuchanan @DrugScope	29/11/2013 11:33:53 AM	Tweet	1	Cannabis schizophrenia MAYBE	ReGenUC julianbuchanan DrugScope	Josip
406459689933996032	CAMHnews	RT @CAMHnews: The benefits of seeking help for #Schizophrenia reach further than you think. Visit http://t.co/UTg0BTLpC3 for more info	30/11/2013 3:28:36 AM	Retweet	4	Schizophrenia	CAMHnews	CAMH	Official account of the Centre for Addiction and Mental Health, Canada's largest mental health and addiction teaching hospital. Together, we transform lives.	Toronto, ON, Canada	http://t.co/Tqhxhu0akE

## Sheet: Depression tweets 10%
Tweet ID	Username	Tweet	Date	Tweet or Retweet	Number of retweets	Hashtags	Mentions	User	Location	URL	Bio
406842010164031488	__synesthesia	RT @__synesthesia: the person I love and want the most doesn't feel the same and Idk how to get him out of my head. #depression	1/12/2013 4:47:48 AM	Retweet	1	depression	__synesthesia	synesthesia	shadow of the moon		dreamcatcher #illhueminati
406807811452977153	__synesthesia	the person I love and want the most doesn't feel the same and Idk how to get him out of my head. #depression	1/12/2013 2:31:55 AM	Tweet	1	depression		synesthesia	shadow of the moon		dreamcatcher #illhueminati
406800626732244992	_BrownEy3Beauti	#Depression Is Here... #Duces	1/12/2013 2:03:22 AM	Tweet	0	Depression Duces		R.I.P Daddy ♈	A Step Closer..		20 Young Of Age | THUG Life | Independent | Ms. Sidney | 4 . Twelve . 93 ι ℓσνє мσикєуѕ ツ♥♡
405930246706192384	Daniel_L_Baker	If you're suffering from #depression, then download my FREE e-book at http://t.co/oi3n2PobPL @heylandsberg http://t.co/kLmYGW756K	28/11/2013 4:24:47 PM	Tweet	5	depression	heylandsberg	Danny Baker	Sydney, Australia	http://t.co/oi3n2PobPL	Author and founder of the Depression Is Not Destiny Campaign. Get your FREE copy of my tell-all memoir, The Danny Baker Story, at my website today.
406827333346426881	metcalfe_emily	Wearing my black ribbon! #selfharmawarenessday Wearing it for: #depression #anorexia #bulimia #selfharm #psychosis Don't judge	1/12/2013 3:49:29 AM	Tweet	0	selfharmawarenessday depression anorexia bulimia selfharm psychosis		Emmy			Dont judge what you dont know! In recovery! Be proud of who you are coz who you are is beautiful! Bisexual and idc what you think bout it:)
405338709123293186	OnlineTherapy77	To Heal #DEPRESSION you must make friends with your emotions. This creates the right conditions in which healing can occur. Please RT!	27/11/2013 1:14:13 AM	Tweet	0	DEPRESSION		Online Therapist	Boulder, Colorado	http://t.co/jbtxSVIa	Online Mindfulness Therapy via Skype for Anxiety & Panic Attacks, Depression and Stress, Addictions & Eating Disorders. Email inquiries welcome.
406538068435300352	jhobson67	Oh yeah, another fantastic side effect of suddenly stopping your SSRI; constant bloody yawning. #depression	30/11/2013 8:40:03 AM	Tweet	0	depression		jhobson	Devon		Interested in crime, LGBT, social equality & poverty, cats & football. Religion to. I don't automatically follow back.
405904957196337153	BurnTenason	The shadow is hunting me again. This time, it's from somewhere unknown. :"( #Depression	28/11/2013 2:44:17 PM	Tweet	0	Depression		Burn Andrew Bernabe	Iloilo City, Philippines	http://t.co/vA61ZktT8u	AB Broadcasting Student of WVSU | Frustrated Photographer | Crazy Kid | Mood swings | Immature | Canon; Delighting You Always |
405791715556335616	DrGlennMiya	#Stress can cause chemical changes in your body which will activate fat programs http://t.co/UwzjvJq7x1 #depression	28/11/2013 7:14:18 AM	Tweet	0	Stress depression		Glenn Miya	Los Angeles, CA USA	http://t.co/0a0e2VMDFh	Physician and Host of Smart Health radio show.
407315899553943552	Abby_Bearii	RT @Abby_Bearii: #OldAge #Responsibilities #CXC #NoMoreFriends #Lonely #Depression #Sigh	2/12/2013 12:10:52 PM	Retweet	3	OldAge Responsibilities CXC NoMoreFriends Lonely Depression Sigh	Abby_Bearii	R.I.P. Paul Walker	Trinidad and Tobago		...........................Too many fish in the sea to miss one......................... #TeamJesusChrist
405201774325534720	Tamralynnsmith	Beware Of Seasonal Depression - #military... http://t.co/tMfzc73En1 #book #depression #thebook #writer	26/11/2013 4:10:05 PM	Tweet	0	military book depression thebook writer		Tamra Lynn Smith	Surprise Arizona	http://t.co/NaXb2fjbxT	Proud Army Mom, grandma, indie hit songwriter, founded projecttroops.org, writes 4 tipsforlove.net, new book out on life & love advice with Professor Nagle
406861384451129344	LovAriMix1D	It pisses me off when people make jokes about self harm. It's not funny at all. #selfharm #depression… http://t.co/fYoplkKaPa	1/12/2013 6:04:47 AM	Tweet	0	selfharm depression		HAPPY HANNUKAH!!!	Chicago/London	http://t.co/YytoiVaw72	Click Here To See My Bio: http://t.co/c00jbK4aX5 LM 6.3.13 1D Concert 7.14.13
405354394759487488	1stYrDivorce	How to support a loved one who is dealing with #depression http://t.co/AbqTGCHNQF via @GoodMenProject @kate_bartolotta	27/11/2013 2:16:33 AM	Tweet	0	depression	GoodMenProject kate_bartolotta	Divorced Kat	Suburbs of NYC	http://t.co/TVOz98JMnd	#divorce
406537316606300160	jhobson67	If you're on a strong dosage of an SSRI, i.e. >350mg a day, do NOT stop cold turkey. It's Gut wrenchingly vile & frightening. #depression	30/11/2013 8:37:04 AM	Tweet	0	depression		jhobson	Devon		Interested in crime, LGBT, social equality & poverty, cats & football. Religion to. I don't automatically follow back.
405119015514669057	PTSDNet	Now accepting new clients for ONLINE COUNSELING via Skype for #ANXIETY & #DEPRESSION. http://t.co/7qi741Si3F. Email me. Please Retweet!	26/11/2013 10:41:14 AM	Tweet	0	ANXIETY DEPRESSION		Online Therapist	Boulder, Colorado, USA	http://t.co/Yql2ImFvdV	Professional Online Mindfulness Therapist offers Online Therapy via Skype for Anxiety, Depression, PTSD, Stress & Addictions. Contact me to schedule a session.
405418755863240704	MindfulnessMan	I offer Online Therapy Sessions for overcoming #anxiety and #depression http://t.co/8gw6819elo Contact me to learn more. Please RT!	27/11/2013 6:32:18 AM	Tweet	0	anxiety depression		Mindfulness Therapy	Boulder, CO, USA	http://t.co/zfZYQccFaI	Online Mindfulness Therapist, Teacher and Author of 'The Path of Mindfulness Meditation' - the application of mindfulness for healing emotional suffering.
407383425385897984	apoemaday	@AlsopElderLaw #Care for your #elders? I did this film for them! What do you think? https://t.co/DXxgjtNMnO #depression #ageing #love	2/12/2013 4:39:12 PM	Tweet	0	Care elders depression ageing love	AlsopElderLaw	Jean Mercier	Montreal, Canada	https://t.co/qPjoZ6vuOc	+ 1,440,000 FANS on FB! Love Notes for the Soul since 2003! © Poems by Jean Mercier. Photos by Junichiro Kuniyoshi. Books now available! ReTweet with love!
405402374552178688	dyzamecef	If you miss a dose of #depression Bupropion and are using it regularly, http://t.co/Q02QauF7oB	27/11/2013 5:27:12 AM	Tweet	0	depression		dyzamecef	Coventry
408128797930967040	PTSDNet	RT @PTSDNet: Talk to a therapist online for help with #ANXIETY, #PANIC #ATTACKS & #DEPRESSION. http://t.co/XHHSnz4vl7. Email me. Please Ret…	4/12/2013 6:01:02 PM	Retweet	1	ANXIETY PANIC ATTACKS DEPRESSION	PTSDNet	Online Therapist	Boulder, Colorado, USA	http://t.co/Yql2ImFvdV	Professional Online Mindfulness Therapist offers Online Therapy via Skype for Anxiety, Depression, PTSD, Stress & Addictions. Contact me to schedule a session.
407033214553702400	BestTherapy4U	Online Counseling for #ANXIETY & #DEPRESSION - Now accepting new clients. http://t.co/ap39zVaC4X. Contact me now. Please Retweet!	1/12/2013 5:27:35 PM	Tweet	0	ANXIETY DEPRESSION		Online Therapy	Boulder, Colorado, USA	http://t.co/d8Y659ZCRi	Professional Mindfulness Therapist. I provide Online Mindfulness Therapy via Skype for Depression, Anxiety, Addictions & Relationship problems.
406528965193392128	GeorginasMusic	#depression #unhappy #WhatYouShouldUnderstandAboutMe http://t.co/sqPxYfz4OV via @imgfave	30/11/2013 8:03:52 AM	Tweet	0	depression unhappy WhatYouShouldUnderstandAboutMe	imgfave	Georgina Ragan			Music fanatic, lasagna lover, superstar in the making
406108060969873408	ElieGhattas1	I should take a dead break. Where i actually kill myself #depression	29/11/2013 4:11:21 AM	Tweet	0	depression		∑lie Għattass	Inside a Black Hole.	http://t.co/ZeVda8zg2t	Physics Freak. The Universe, The Atoms & I… -M
405644024595619840	IJKeddiePoet	http://t.co/ucQ0ISKcg9 ~ #Poem #Poetry #Writing #CreativeWriting #Anxiety #Depression #LGBT #MentalHealth #Gay #Haiku #WordPress #ICYMI	27/11/2013 9:27:26 PM	Tweet	1	Poem Poetry Writing CreativeWriting Anxiety Depression LGBT MentalHealth Gay Haiku WordPress ICYMI		IJ Keddie	Caerdydd Bay	http://t.co/yYmECtEaBz	Poet/Writer/Activist ~ #SxltFlxts ~ http://t.co/Ec8cw4Avuh ~ I'm hiding behind your curtains.
405643505152045056	Witleyboy	@bjfm @socialcaredan Social media is confusing what it measn to be clinically depressed http://t.co/kmegYjRpdl #depression	27/11/2013 9:25:22 PM	Tweet	0	depression	BJFM socialcaredan	Andrew Chilvers	England		Writer, editor, digital publisher, social media obsessive, whinger, father, free thinker
405708518155890689	DrZahwa	RT GEHealthcare: New study links #depression to #Parkinson’s http://t.co/tok1wXHxH9	28/11/2013 1:43:43 AM	Tweet	0	depression Parkinson		Dr. Hassan Zahwa	DC Metro, US	http://t.co/GD4hESCW0S	Ph.D. in Nuclear Medicine & Molecular Biology, MBA, Masters in Healthcare Administration, BS Medical Technology. Strong IM/IT Background. Associate Professor.
406820711571787777	MindfulTherapy4	Online Counseling Therapy for #Anxiety & #Depression via Skype: http://t.co/9414BPyJi6 via @youtube. Learn more &amp; email me. Please Retweet!	1/12/2013 3:23:10 AM	Tweet	0	Anxiety Depression	YouTube	Mindfulness Therapy	Boulder, Colorado	http://t.co/Zdqq3ID5Zk	Online Mindfulness Therapist via Skype - providing Professional Online Therapy for problems with Anxiety, Depression, Stress, Addictions and Relationships.
405351748409098240	DrAlloo	Free #self-care tools+guides for patients to help work through mood issues + #depression: http://t.co/K8BTvNXOJk <via @DrSheilaW @sphcme	27/11/2013 2:06:02 AM	Tweet	0	self depression	DrSheilaW sphcme	Dr Alloo	Toronto, ON, Canada	http://t.co/JLjcjAWZve	family physician, advocate and all-around cheerleader for my patients as they strive for a healthy balance in life - tweets are general information only.
405129460250591232	MHRUKCharity	@JasonWilkesWWTW @SurfAction There was a recent news article on surfing as therapy for #depression	26/11/2013 11:22:44 AM	Tweet	1	depression	JasonWilkesWWTW SurfAction	MHRUK	UK	http://t.co/H1tMsP42Dk	The 1st UK charity dedicated to funding research into mental illness causes to develop better treatments/cures & make a long-term difference
405120294232133632	MindfulTherapy4	Online Therapy for #Anxiety & #Depression via Skype : http://t.co/97XaiuAprK via @youtube. Contact me now! Please RT!	26/11/2013 10:46:19 AM	Tweet	0	Anxiety Depression	YouTube	Mindfulness Therapy	Boulder, Colorado	http://t.co/Zdqq3ID5Zk	Online Mindfulness Therapist via Skype - providing Professional Online Therapy for problems with Anxiety, Depression, Stress, Addictions and Relationships.
405770722426900480	apoemaday	@geezerlaw #Care for #Elders? I did this - What do you think? http://t.co/gWDw8nginx Ask your #library for #ADayInALife #depression #aging	28/11/2013 5:50:53 AM	Tweet	0	Care Elders library ADayInALife depression aging	geezerlaw	Jean Mercier	Montreal, Canada	https://t.co/qPjoZ6vuOc	+ 1,440,000 FANS on FB! Love Notes for the Soul since 2003! © Poems by Jean Mercier. Photos by Junichiro Kuniyoshi. Books now available! ReTweet with love!
406844814475677696	GhadeerQarni	#Emotional #depression http://t.co/FMlVaw0XfL	1/12/2013 4:58:57 AM	Tweet	0	Emotional depression		جوتيم	ف المفضلة لاتكن لصي *		‏كاتبة تغوي الكلمات في رقصة تمرد على هاوية الحب..!
405748218975113217	MindfulTherapy4	ONLINE THERAPY: http://t.co/HdaheWEUcx via @YouTube. Please contact me to schedule a Skype session for #Anxiety & #Depression. Please RT!	28/11/2013 4:21:28 AM	Tweet	0	Anxiety Depression	YouTube	Mindfulness Therapy	Boulder, Colorado	http://t.co/Zdqq3ID5Zk	Online Mindfulness Therapist via Skype - providing Professional Online Therapy for problems with Anxiety, Depression, Stress, Addictions and Relationships.
405090254346256384	Psych2morrowmag	RT @Psych2morrowmag: #Antidepressants: The Problem with the Solution by @Saddafs - http://t.co/tYORKd6p0l | #Depression | #Overmedication …	26/11/2013 8:46:57 AM	Retweet	6	Antidepressants Depression Overmedication	Psych2morrowmag saddafs	Psychology Tomorrow	Open your eyes...	http://t.co/4yohZzGOo0	#PsychologyTomorrow explores the practice of #psychology as an #art, in all its complex possibilities... | http://t.co/6ICDGLVMlx | http://t.co/959DgsZqxO |
405396686266437632	BioMedCentral	A sad heart is a bad heart. Major #depression may contribute to 3% of global ischemic #heart disease, yikes! - http://t.co/eAAEOBU78J	27/11/2013 5:04:36 AM	Tweet	9	depression heart		BioMed Central	London,UK	http://t.co/ObcAV9Br0x	The Open Access Publisher. Most tweets by @justbalmy and @roobina
407008339965403137	isuperluvdawson	I am so sad :'( #depression	1/12/2013 3:48:44 PM	Tweet	0	depression		Tryvor Drew Lemberg			i luff Puppies and also i loveee romance novels and movies and all out luv, luv lol i love cupcakes and i luv louis from 1D i love me bffs and i am a youtuber
407340423540400128	Needtotalkbook	How to climb out of... http://t.co/JUxrro09uq #Authors #book #depression #kids #stress	2/12/2013 1:48:19 PM	Tweet	0	Authors book depression kids stress		Top writing duo	Don't miss this great blog	http://t.co/FVNxPggI8M	Top writing duo bring u best tips 4 dating, happy relationships, divorce, moving on, healing, break ups & more free blog http://t.co/FVNxPggI8M new book out too
406823787754053632	bupivaket	#girls #pretty #society #so #true #ugly #arent #we #fake #depressed #depression #hate #how #i #look #beautiful http://t.co/4Nbl0lCgtK	1/12/2013 3:35:24 AM	Tweet	0	girls pretty society so true ugly arent we fake depressed depression hate how i look beautiful		Earlene Reams	everywhere	http://t.co/ParKTRx9	I Love #girls, i share a lot of pics on my blog
406632503118532608	SkypeTherapist	ONLINE THERAPY VIA SKYPE - Learn how to overcome #ANXIETY & #DEPRESSION through #MINDFULNESS #THERAPY http://t.co/DCNIiURo4I. Please RT!	30/11/2013 2:55:18 PM	Tweet	0	ANXIETY DEPRESSION MINDFULNESS THERAPY		Online Therapist	Boulder CO, USA	http://t.co/A3Ve4p9NRS	Professional Mindfulness Therapist, Teacher & Author - Online Therapy via Skype for Anxiety, Panic Attacks, Depression, PTSD, Addictions & Emotional Well-Being.
405785739725901824	Alice_Haystack	RT @Alice_Haystack: '39' by @amandagreenUK is "Truly inspirational!" http://t.co/EiOJwOdeXi #sequel #memoir #midlife #depression http://t.c…	28/11/2013 6:50:34 AM	Retweet	3	sequel memoir midlife depression	Alice_Haystack AmandaGreenUK	Alice Huskisson	Essex	http://t.co/NCOC0I5nJI	#Author of THE MAN IN A HAYSTACK #Amazon #BESTSELLER http://t.co/54qeWVPP2C http://t.co/iERsPpjg7u
407265788811575296	sadsuicidalgirl	RT @sadsuicidalgirl: Just about sums it all up! #weightloss #depression #starving #dead #selfharm #believe http://t.co/O84E3n43Mz	2/12/2013 8:51:45 AM	Retweet	3	weightloss depression starving dead selfharm believe	sadsuicidalgirl	sadsuicidalgirl			self harmer, deep depression, bulimic and just wanna be dead right now! Always here to talk if anyone needs it! I love u all! Dont cry tonight xxxx
405445930364579842	GreenSkyDeb	GR8 Read 4 those seeking #healing #recovery #relationships #depression The Sky is Green and The.. http://t.co/WPDUl6GEKQ”	27/11/2013 8:20:17 AM	Tweet	0	healing recovery relationships depression		Deb Scott, BA, CPC	Boston, MA	http://t.co/HU7FhsSvnR	Award Winning #Author- Sky is Green & Grass is Blue | #Radio Host- #BestPeople We Know Show | #Inspiration | #Blogger ♥♥ Ƹ̵̡Ӝ̵̨̄Ʒ ♥♥
406444482171637760	dpeelmd	US violated #privacy of disabled Canadian/used her #EHR to deny cruise travel! Are US patients w/ #Depression next? http://t.co/RbHriwsVnA	30/11/2013 2:28:10 AM	Tweet	0	privacy EHR Depression		Deborah C. Peel MD	Mostly Austin, Texas	http://t.co/G2kJrcMpTq	Privacy warrior. Control over health data is essential for trust in doctors, research, electronic health systems, and Democracy.
405298258370498560	OnlineTherapy7	Counseling Therapy Online via Skype - Providing effective help for #ANXIETY & #DEPRESSION. http://t.co/j1ZvJCkZsI. Email me. Please Retweet!	26/11/2013 10:33:29 PM	Tweet	0	ANXIETY DEPRESSION		Online Therapist	Louisville, Colorado	http://t.co/7gNj8EQd	Online Mindfulness Therapist via Skype for Depression, Anxiety, Addictions, Stress & Relationship Problems. Contact me today to learn more.
405732195060301825	apoemaday	@OSG_Be_Safe #Care for #Elders? I did this - What do you think? http://t.co/gWDw8nginx Ask your #library for #ADayInALife #depression	28/11/2013 3:17:48 AM	Tweet	0	Care Elders library ADayInALife depression	OSG_Be_Safe	Jean Mercier	Montreal, Canada	https://t.co/qPjoZ6vuOc	+ 1,440,000 FANS on FB! Love Notes for the Soul since 2003! © Poems by Jean Mercier. Photos by Junichiro Kuniyoshi. Books now available! ReTweet with love!
405803044874379264	MindfulTherapy4	Now accepting new clients for ONLINE THERAPY via Skype for #ANXIETY & #DEPRESSION. http://t.co/E55Q0DiOiZ. Email me. Please Retweet!	28/11/2013 7:59:20 AM	Tweet	0	ANXIETY DEPRESSION		Mindfulness Therapy	Boulder, Colorado	http://t.co/Zdqq3ID5Zk	Online Mindfulness Therapist via Skype - providing Professional Online Therapy for problems with Anxiety, Depression, Stress, Addictions and Relationships.
405811959079006208	AliciaHendley	RT @AliciaHendley: My latest blog post: Leaning out. http://t.co/Kl7ONfsuR4 #autism #parenting #depression #support	28/11/2013 8:34:45 AM	Retweet	1	autism parenting depression support	AliciaHendley	Alicia Hendley	Ontario	http://t.co/IZl9S5hODs	Mom of 4, including a sweet boy with autism. Ph.D. in clinical psychology. Diagnosed with Bipolar 2. Author of fiction (A Subtle Thing, TYPE) & memoir.
405248541519384577	andrewdsnell	Great article: “@avismulhall: Depression Is NOT a Mental Illness http://t.co/I8MNxAPWt1 via @HuffPoLifestyle #depression #mentalhealth”	26/11/2013 7:15:56 PM	Tweet	0	depression mentalhealth	avismulhall HuffPoLifestyle	Andrew Snell	Canberra		Innovative&creative entrepreneur, consultant, prod. designer. I live for great ideas and the never done before. Opinions are mine. @coastergroup @Rc_digital
405732406885236736	apoemaday	@CanadianPA #Care for #Elders? I did this - What do you think? http://t.co/gWDw8nginx Ask your #library for #ADayInALife #depression	28/11/2013 3:18:38 AM	Tweet	0	Care Elders library ADayInALife depression	CanadianPA	Jean Mercier	Montreal, Canada	https://t.co/qPjoZ6vuOc	+ 1,440,000 FANS on FB! Love Notes for the Soul since 2003! © Poems by Jean Mercier. Photos by Junichiro Kuniyoshi. Books now available! ReTweet with love!
405193389231980545	OnlineTherapy77	ONLINE THERAPIST FOR #ANXIETY & #DEPRESSION: http://t.co/38XNGRVsYL via @youtube. Schedule a session now. Please RT!	26/11/2013 3:36:46 PM	Tweet	0	ANXIETY DEPRESSION	YouTube	Online Therapist	Boulder, Colorado	http://t.co/jbtxSVIa	Online Mindfulness Therapy via Skype for Anxiety & Panic Attacks, Depression and Stress, Addictions & Eating Disorders. Email inquiries welcome.
406412475786346496	AnnaMaidana	#depression ON :(	30/11/2013 12:20:59 AM	Tweet	0	depression		Anna Maidana			Hockey ❤
407026272766656512	Psych2morrowmag	#Antidepressants Alone Cannot Cure #Depression: (Psychotherapy Alone Can) | Counsel & Heal - http://t.co/wp45OZ79C6 | http://t.co/TmhjHmbZDd	1/12/2013 5:00:00 PM	Tweet	9	Antidepressants Depression		Psychology Tomorrow	Open your eyes...	http://t.co/4yohZzGOo0	#PsychologyTomorrow explores the practice of #psychology as an #art, in all its complex possibilities... | http://t.co/6ICDGLVMlx | http://t.co/959DgsZqxO |
405219057621688320	CharitySANE	RT @CharitySANE: A favourite thought for the day #mentalhealth #BlackDogCampaign #oneinfour #MHUK #depression #1in4 #MH http://t.co/Apk9aA8…	26/11/2013 5:18:46 PM	Retweet	21	mentalhealth BlackDogCampaign oneinfour MHUK depression 1in4 MH	CharitySANE	SANE	London, UK	http://t.co/OVkNj7KGam	SANE improves quality of life for anyone affected by mental health problems, including family, friends and carers
405648244731953152	Daniel_L_Baker	RT @Daniel_L_Baker: EVERYONE with #depression needs to read and remember this: http://t.co/pRWmqkfEhy	27/11/2013 9:44:12 PM	Retweet	19	depression	Daniel_L_Baker	Danny Baker	Sydney, Australia	http://t.co/oi3n2PobPL	Author and founder of the Depression Is Not Destiny Campaign. Get your FREE copy of my tell-all memoir, The Danny Baker Story, at my website today.
405838021892648960	apoemaday	@deannatan1 #Care 4 #Elders? I did this -What do you think? http://t.co/gWDw8nginx Ask your #library for #ADayInALife #depression #ageing	28/11/2013 10:18:19 AM	Tweet	0	Care Elders library ADayInALife depression ageing	deannatan1	Jean Mercier	Montreal, Canada	https://t.co/qPjoZ6vuOc	+ 1,440,000 FANS on FB! Love Notes for the Soul since 2003! © Poems by Jean Mercier. Photos by Junichiro Kuniyoshi. Books now available! ReTweet with love!
405333874185494528	MindfulTherapy4	Online Counseling Therapy for #Anxiety & #Depression : http://t.co/9414BPyJi6 via @youtube. Contact me! Please RT!	27/11/2013 12:55:01 AM	Tweet	0	Anxiety Depression	YouTube	Mindfulness Therapy	Boulder, Colorado	http://t.co/Zdqq3ID5Zk	Online Mindfulness Therapist via Skype - providing Professional Online Therapy for problems with Anxiety, Depression, Stress, Addictions and Relationships.
405640846797586433	animaniac_	#depression makes me feel like i'm constantly living a outer body experience when i'm on my own.	27/11/2013 9:14:48 PM	Tweet	0	depression		Alanna Diggin	Anywhere I want :)		Live Life. My blog about my life : http://t.co/iKcPB5WkDw
407268242789384192	superfurryandy	SSRI withdrawal http://t.co/meuPcV5xIG via @SamAmbreen #depression #anxiety #mentalhealth	2/12/2013 9:01:30 AM	Tweet	0	depression anxiety mentalhealth	SamAmbreen	Andy Bean	Lundun	http://t.co/66Kqd9aKmx	A bear that cares, does stuff and likes stuff, music an' comedy an' stuff. Political with a big P. Hustler of culture. Occasional language. Grey hairs.
406423208322420736	womenshealthnet	Are You Depressed? Signs and Symptoms of Depression in Women: http://t.co/h2YR0SYZdW #depression Please RT	30/11/2013 1:03:38 AM	Tweet	0	depression		Janelle Lawrence			Stay-at-home mom who loves reading, travel, good food, and wine and loves to talk about women's health!
405416212513181696	smallzieredblue	RT @smallzieredblue: Nice to finally see #Depression #Stress #Anxiety getting exposure in the papers, maybe the #Stigma will shift? http://…	27/11/2013 6:22:11 AM	Retweet	1	Depression Stress Anxiety Stigma	smallzieredblue	Lee Smallbone	Farnham	http://t.co/nbLLReZY2B	Aldershot&Arsenal Fan Carpenter&Joiner @ThursleyCricket ClubSponsorship Coordinator&ownerOf #MASHUP @hashtagmashup1 CreativeColthing(coming2013)
406424563116171264	Art_I_Fish	I'm glad I have my cats, without them I'd have nothing, I struggle to find reasons to stay nearly every hour #personal #depression #sad	30/11/2013 1:09:01 AM	Tweet	0	personal depression sad		Arthur Fish	Durham		Cat loving geek. Wannabe picture taker. Lost Soul. Always up for some craïc - #Atheist Atelophobic BBM 7AD2C509 http://t.co/phrNjgbZXj
406557601301020672	DennyCoates	Life can suck even for normal teenagers. Some reasons why... http://t.co/FXsiKnS5WZ #depression	30/11/2013 9:57:40 AM	Tweet	0	depression		Denny Coates	San Antonio, Texas	http://t.co/fghfjmZNoB	Author of Conversations with the Wise Uncle & Conversations with the Wise Aunt. Creator of ProStar Coach, online virtual gym for personal development.
406267679574855680	Daniel_L_Baker	You can’t always fix your friend’s problems, but you can promise them that they won’t have to face them alone. #MentalHealth #Depression	29/11/2013 2:45:37 PM	Tweet	4	MentalHealth Depression		Danny Baker	Sydney, Australia	http://t.co/oi3n2PobPL	Author and founder of the Depression Is Not Destiny Campaign. Get your FREE copy of my tell-all memoir, The Danny Baker Story, at my website today.
406315375320903680	ChristianIndieB	Her life is about to slide off into the darkness. A LIGHT IN THE DARKNESS http://t.co/eKPgxFRQhl #indie #Nook #BN #depression #Christian	29/11/2013 5:55:09 PM	Tweet	0	indie Nook BN depression Christian		ChristianIndieBooks			Bringing you the best in Christian Indie Books and Ebooks!
405631624680718336	M2Aden	For those who have #depression Suicide may have crossed your mind to end the pain. It certainly crossed mine: http://t.co/KPiLIgWCVW”	27/11/2013 8:38:10 PM	Tweet	0	depression		Aden Miles	aotearoa		Journalist, freelancer, wannabe photographer, avid recipe book reader and potential tennis champion. A spirit determined to always fly.
406188933358186496	TheMHCA	How Canberra father of three Craig Bath is coping with his long-standing battle with #anxiety and #depression http://t.co/lTkJKJhTOi	29/11/2013 9:32:42 AM	Tweet	2	anxiety depression		MHCA	Canberra, Australia	http://t.co/O1cWnC1SLQ	The peak, national non-government organisation representing the Australian mental health sector.
407299657203589120	DrJaneChi	RT @DrJaneChi: Appalling. RT @TheMadvocates: Canadian woman refused U.S. entry because of #depression http://t.co/Mld9RnK3Sk	2/12/2013 11:06:20 AM	Retweet	8	depression	DrJaneChi TheMadvocates	Jane Doe, MD	Midwest		Family physician, feminist, reproductive justice crusader, critical race & class analyst, gender deconstructor, lover of bunnies. Cis. She/her.
406455354701017088	PTSDNet	ONLINE THERAPIST FOR #ANXIETY & #DEPRESSION: http://t.co/JJO0hTHobt via @youtube. Schedule a session now. Please RT!	30/11/2013 3:11:22 AM	Tweet	0	ANXIETY DEPRESSION	YouTube	Online Therapist	Boulder, Colorado, USA	http://t.co/Yql2ImFvdV	Professional Online Mindfulness Therapist offers Online Therapy via Skype for Anxiety, Depression, PTSD, Stress & Addictions. Contact me to schedule a session.
405260613288726528	Ri_Aus	Is the current media shortcut of reducing everything to lists dangerous? Yes, says Dr Oliver, can prompt self diagnosis #depression	26/11/2013 8:03:54 PM	Tweet	0	depression		RiAus	Adelaide, Australia	http://t.co/xntU5FRmBI	Bringing science to people and people to science.
406499659150925824	JLynReads	RT @JLynReads: @HealthyPlace Things I'm thankful for: That #Thanksgiving is over for another year. #anxiety #depression	30/11/2013 6:07:25 AM	Retweet	2	Thanksgiving anxiety depression	JLynReads HealthyPlace	JLyn
407381788667809792	Daniel_L_Baker	RT @Daniel_L_Baker: My new post for @goodmenproject: 5 Things You Should Do Each Day If You're Suffering From #Depression: http://t.co/h5Rr…	2/12/2013 4:32:41 PM	Retweet	10	Depression	Daniel_L_Baker GoodMenProject	Danny Baker	Sydney, Australia	http://t.co/oi3n2PobPL	Author and founder of the Depression Is Not Destiny Campaign. Get your FREE copy of my tell-all memoir, The Danny Baker Story, at my website today.
406567118675525633	thin_pro	RT @thin_pro: What I am.. #ana #anorexia #ed #eatingdisorder #mia #ednos #bulimia #depression #ugly http://t.co/74WGJHAfF3	30/11/2013 10:35:29 AM	Retweet	9	ana anorexia ed eatingdisorder mia ednos bulimia depression ugly	thin_pro	Pro Thin ❤	XoXo S and K	http://t.co/Bq17GkPsFx	Two girls dedicated to perfection- its a long road but we'll get there. Instagram: anas_girls_ Ask: http://t.co/5WijwGiamf
406221316728311808	utiles	RT @utiles: WINTERY SOUL Music by @TakeNoGlory http://t.co/8jj0AkClGY #Hope from #Depression Song about #Peace and #Joy	29/11/2013 11:41:23 AM	Retweet	4	Hope Depression Peace Joy	utiles TakeNoGlory	Utile Family	Santa Cruz, CA	http://t.co/T1RDlm7lUm	We are so #grateful for our #blessed life. Ian and Johnna are the proud parents of sons Malakye & Kenton. Johnna leads @TakeNoGlory - @IanUtile leads @YouRealty
405446661796675585	Tamralynnsmith	A Son... http://t.co/C42nThIRzW #Authors #children #depression #families #family #military #projecttroops #veterans	27/11/2013 8:23:11 AM	Tweet	0	Authors children depression families family military projecttroops veterans		Tamra Lynn Smith	Surprise Arizona	http://t.co/NaXb2fjbxT	Proud Army Mom, grandma, indie hit songwriter, founded projecttroops.org, writes 4 tipsforlove.net, new book out on life & love advice with Professor Nagle
406616471930814465	BestTherapy4U	Online Counseling Therapy for #Anxiety & #Depression via Skype: http://t.co/xNYN76OVQC via @youtube. Learn more &amp; email me. Please Retweet!	30/11/2013 1:51:36 PM	Tweet	0	Anxiety Depression	YouTube	Online Therapy	Boulder, Colorado, USA	http://t.co/d8Y659ZCRi	Professional Mindfulness Therapist. I provide Online Mindfulness Therapy via Skype for Depression, Anxiety, Addictions & Relationship problems.
406462684087857153	BishopGreenCO	RT @BishopGreenCO: Keep people in prayer. Holidays are the biggest depression season of the year! #realfacts #realtalk #depression #holiday…	30/11/2013 3:40:30 AM	Retweet	2	realfacts realtalk depression holiday	BishopGreenCO	Bishop-Kenneth Green	Denver, Colorado	http://t.co/CejbeoysuI	Hello, i am Kenneth, serving as Suffragan Bishop to @ArchbishopYoung . Im a young man on fire for the lord and his work! Member of @abundantlifeif
406686572063379456	apoemaday	@nytimes I did this film for #elders. What do you think? #letstalk http://t.co/fAQc3Fa8ZY #ageing #depression	30/11/2013 6:30:09 PM	Tweet	0	elders letstalk ageing depression	nytimes	Jean Mercier	Montreal, Canada	https://t.co/qPjoZ6vuOc	+ 1,440,000 FANS on FB! Love Notes for the Soul since 2003! © Poems by Jean Mercier. Photos by Junichiro Kuniyoshi. Books now available! ReTweet with love!
405663783005454336	citypsych	Is your #boss getting you down? http://t.co/9NHtbI4B0u #depression #justice #injustice #employment #psychology #mentalhealth	27/11/2013 10:45:57 PM	Tweet	0	boss depression justice injustice employment psychology mentalhealth		CityPsychologyGroup	London	http://t.co/XjlOEkYebv	CPG is an independent practice of highly skilled Chartered Psychologists based in London, working to achieve great results in a time sensitive & effective way.
405892000173404161	OnlineTherapy77	Online Counseling Therapy for #Anxiety & #Depression via Skype: http://t.co/DeU6ukuMrr via @youtube. Email me. Please Retweet!	28/11/2013 1:52:48 PM	Tweet	0	Anxiety Depression	YouTube	Online Therapist	Boulder, Colorado	http://t.co/jbtxSVIa	Online Mindfulness Therapy via Skype for Anxiety & Panic Attacks, Depression and Stress, Addictions & Eating Disorders. Email inquiries welcome.
405910118547476480	aidaluz44	Tips About How To Use Positive Thoughts To Combat De http://t.co/OrBipD6FiX #depression	28/11/2013 3:04:48 PM	Tweet	0	depression		Aida Luz	Las Vegas	http://t.co/p355DwvtLz	Trying to help people forgive their spouse's infidelity. Love reading, writing and watching movies (nightly). Oh yeah and Spanish soap operas.
407253909066252288	natasha_tracy	RT @natasha_tracy: 8 Things to Be Thankful for If You Have a Mental Illness http://t.co/e8d6NnzixP #thanksgiving #depression #bipolar #ment…	2/12/2013 8:04:33 AM	Retweet	2	thanksgiving depression bipolar ment	natasha_tracy	Natasha Tracy	The West Coast	http://t.co/UoM7Vr0LET	I'm an award-winning mental health writer w/ a broken brain & a mind trying to deal with it. My writing is often devastating & controversial. Sorry about that.
407425879053049856	BenjaminDMiller	#Antidepressants Alone Cannot Cure #Depression: (Psychotherapy Alone Can) | Counsel & Heal - http://t.co/3yKWvetUuE | http://t.co/3oNbnU1DiO	2/12/2013 7:27:53 PM	Tweet	1	Antidepressants Depression		Ben Miller		http://t.co/PmDdusRFxF	COO of #PsychologyTomorrow @Psych2morrowmag, Explorer at the intersection of #art and #psychology... | http://t.co/NgYMYd4ITX | http://t.co/U3eeNH0zUp |
405099190180929536	CCJoy11	Mood Food ~Brazil nuts ~just 1 a day could provide daily intake of selenium ~low levels can lead to anxiety, #depression & irritability	26/11/2013 9:22:27 AM	Tweet	0	depression		CCJoy	London		Health, Fitness & Well-Being. Interested in Personal Development and Psychology. Where shall my travels take me next?
406818797895839744	patientopinion	RT @patientopinion: "I am now on the road to a better and calmer way of life :)" #depression #anxiety @IncMatters Liverpool https://t.co/zV…	1/12/2013 3:15:34 AM	Retweet	4	depression anxiety	patientopinion IncMatters	patientopinion	Sheffield	http://t.co/vTWTKFrmvg	Share the story of your care and help make health care better. Every voice matters!
407299947420086272	lovealexandra20	I laid in bed all day today... #depression	2/12/2013 11:07:29 AM	Tweet	0	depression		Alexandra Cole	Cornhusker State	http://t.co/BOLrvjveNQ	Huskers, Music, Friday Night Lights, CWS Baseball, LIFE. ✗o✗o ♥
405837460266954752	apoemaday	@MHHealthStore #Care 4 #Elders? I did this -What do you think? http://t.co/gWDw8nginx Ask your #library for #ADayInALife #depression	28/11/2013 10:16:05 AM	Tweet	0	Care Elders library ADayInALife depression	MHHealthStore	Jean Mercier	Montreal, Canada	https://t.co/qPjoZ6vuOc	+ 1,440,000 FANS on FB! Love Notes for the Soul since 2003! © Poems by Jean Mercier. Photos by Junichiro Kuniyoshi. Books now available! ReTweet with love!
405177368828203008	DysthymicDad	"Rat Study Aids Understanding of #Depression Treatment | Psych Central News" #mentalhealth http://t.co/SViqc0s96c	26/11/2013 2:33:07 PM	Tweet	0	Depression mentalhealth		DysthAnxious Dad	Ottawa, Ontario (Canada)	http://t.co/HW2KbUsmA8	Mental health advocate living with anxiety and dysthymia (depression). Fighting stigma. Volunteer w/ @PartnersForMH. Opinions are my own.
407026747641978880	Psych2morrowmag	RT @Psych2morrowmag: #Antidepressants Alone Cannot Cure #Depression: (Psychotherapy Alone Can) | Counsel & Heal - http://t.co/wp45OZ79C6 | …	1/12/2013 5:01:53 PM	Retweet	9	Antidepressants Depression	Psych2morrowmag	Psychology Tomorrow	Open your eyes...	http://t.co/4yohZzGOo0	#PsychologyTomorrow explores the practice of #psychology as an #art, in all its complex possibilities... | http://t.co/6ICDGLVMlx | http://t.co/959DgsZqxO |
405742208155795456	DanielleHark	Sometimes no matter how beautiful or cheery the surroundings, #depression wins. ▸ http://t.co/3qeeDiVabJ #photography #art #mentalhealth	28/11/2013 3:57:35 AM	Tweet	0	depression photography art mentalhealth		Danielle Hark	NJ / NYC	http://t.co/FqF64CcxAg	Wellness Writer, MentalHealth Sufferer & Advocate, Photographer, Founder @BrokenLightCo photo gallery for people affected by mental illness. HuffPost, Beliefnet
406586509169786880	Colebert93	Psychiatric disorders don't make me crazy, they make me interesting, and unique #depression #bipolar #adhd	30/11/2013 11:52:32 AM	Tweet	0	depression bipolar adhd		Colebert :))))
405171645708787713	WorldBank	7 out of the top 10 countries in the world ranked for #depression in #women are in the #MENA region. Read why: http://t.co/dMczuW9qb3	26/11/2013 2:10:22 PM	Tweet	44	depression women MENA		World Bank	Washington, DC	http://t.co/BohAKXcGPO	The official World Bank Twitter feed. The World Bank's mission is to fight poverty with passion and professionalism for lasting results.
406496078394306561	commsghost	@CBCNews - I hope you all get #PTSD & #Depression ... Walk a Km in his shoes &amp; maybe you too will understand #rcmp #canada	30/11/2013 5:53:12 AM	Tweet	0	PTSD Depression rcmp canada	CBCNews	Mister			Information Systems, Security, Comm's ... Lower Sackville Nova Scotia
406365913492238336	carolinee06	Hope for those who suffer - MT @nytimes: Curing insomnia could double the chance of full recovery from #depression http://t.co/zjXUhwS8d6	29/11/2013 9:15:58 PM	Tweet	0	depression	nytimes	Caroline Thomas			Business Continuity / Disaster Recovery professional, active LGBT Ally and Bikram Yoga enthusiast - tweeting in a personal capacity
406836126822199296	HealthyPlace	RT @HealthyPlace: #Depression is to Winter as #Anxiety is to the Holidays. New Anxiety-Schmanxiety blog. http://t.co/fUXCSn4i81 #mentalheal…	1/12/2013 4:24:25 AM	Retweet	5	Depression Anxiety mentalheal	HealthyPlace	HealthyPlace	Texas	http://t.co/0x2czks3uC	Trusted information on psychological disorders and treatments, plus mental health support. Home to Stand Up for Mental Health campaign.
405744480214863872	DrDavidHanscom	Depression does affect Chronic Pain RT @GlobalNeuroSI 5 Tips 4 Dealing w/ #Depression & #ChronicPain around #Holidays http://t.co/R1K29TVpXo	28/11/2013 4:06:37 AM	Tweet	0	Depression ChronicPain Holidays	GlobalNeuroSI	David Hanscom	Seattle, Washington	http://t.co/oZQyTpKYgU	Board certified spine surgeon. Founder of DOCC project – “Back In Control” Improve sleep, manage stress, long-term conditioning, pain control & education.
405422834295402496	CMHACalgary	RT @CMHACalgary: RT @YYCConnecTeen: Great resources on #depression & #mental health 4 children &amp; youth: http://t.co/Cy0X7gMZ3Z from @CMHACa…	27/11/2013 6:48:30 AM	Retweet	2	depression mental	CMHACalgary YYCConnecTeen	CMHA - Calgary	Calgary, Alberta	http://t.co/9CaBvjLZ9N	We provide mental health promotion, education, support, advocacy for individuals and families.
406340607120928768	TatsuyaSasu	Plz RT: #mentalhealth #anxiety #depression #areyouokay http://t.co/VQW9tVeqA7	29/11/2013 7:35:24 PM	Tweet	1	mentalhealth anxiety depression areyouokay		Crystal	Sydney		Xbox Live: TatsuyaSasu PSN: TatsuyaSasu Steam: Tatsuya22
405732262764740608	apoemaday	@CoCareCan #Care for #Elders? I did this - What do you think? http://t.co/gWDw8nginx Ask your #library for #ADayInALife #depression	28/11/2013 3:18:04 AM	Tweet	0	Care Elders library ADayInALife depression	CoCareCan	Jean Mercier	Montreal, Canada	https://t.co/qPjoZ6vuOc	+ 1,440,000 FANS on FB! Love Notes for the Soul since 2003! © Poems by Jean Mercier. Photos by Junichiro Kuniyoshi. Books now available! ReTweet with love!
405351912595156992	AnnaKaminsky1	RT @AnnaKaminsky1: New research shows that today's anti-depressants have wrong target - http://t.co/ixJFy3GAhB #mentalhealth #depression #…	27/11/2013 2:06:41 AM	Retweet	19	mentalhealth depression	AnnaKaminsky1	Anna Kaminsky	Canada	https://t.co/5FwKV89HEt	Mom of 2 little angels and Psychologist in making
405840441972916224	BestHealthAcu	RT @BestHealthAcu: @lifewithababy Building Strong Families Conference is underway! #postpartum #depression #newparents #acupuncture http://…	28/11/2013 10:27:56 AM	Retweet	1	postpartum depression newparents acupuncture	BestHealthAcu lifewithababy	AcupunctureAmanda	Vauhgan, Ontario	http://t.co/RTTIjIA4L6	Acupuncturist & Kinesiologist at HHC Holistic Health Clinic. Best of Vaughan Gold Award Winner 2011 and 2012. Top Choice Award winner for Acupuncture 2012.
406256241241899008	SSRFINC	Learn how Ian overcame #depression with spiritual practice and how he can bear anything that life puts infront of him http://t.co/GSL2OJ9Ydo	29/11/2013 2:00:10 PM	Tweet	0	depression		SSRF	Global	http://t.co/ATegvvyEXw	Spiritual research since 1985. Dedicated to the spiritual progress of every individual and society as a whole.
405660497342513153	juxebokai	Rise slowly and use caution #depression until you know how this medicine http://t.co/bVxjXQ7Sdq	27/11/2013 10:32:54 PM	Tweet	0	depression		juxebokai	Kentucky		Genuinely sorry for whatever I did to make you think I give a shit.
405841930803613696	OnlineTherapy77	ONLINE THERAPIST FOR #ANXIETY & #DEPRESSION: http://t.co/38XNGRVsYL via @youtube. Contact me now. Please RT!	28/11/2013 10:33:51 AM	Tweet	0	ANXIETY DEPRESSION	YouTube	Online Therapist	Boulder, Colorado	http://t.co/jbtxSVIa	Online Mindfulness Therapy via Skype for Anxiety & Panic Attacks, Depression and Stress, Addictions & Eating Disorders. Email inquiries welcome.
406588356886548480	Myong_brautigam	#keepcalm #smile #happiness #depression pic,twitter,comLvjUWia4should run with this at some stage during the next week,	30/11/2013 11:59:52 AM	Tweet	0	keepcalm smile happiness depression		Myong Brautigam	Bradenton Beach, United States		The darkest hour is just before dawn. - Italian Proverb
406480370272464896	MindfulTherapy4	Online Counseling Therapy for #Anxiety & #Depression via Skype: http://t.co/9414BPyJi6 via @youtube. Email me. Please Retweet!	30/11/2013 4:50:46 AM	Tweet	0	Anxiety Depression	YouTube	Mindfulness Therapy	Boulder, Colorado	http://t.co/Zdqq3ID5Zk	Online Mindfulness Therapist via Skype - providing Professional Online Therapy for problems with Anxiety, Depression, Stress, Addictions and Relationships.
407023032591331328	SkypeTherapist	E-Therapy - Talk to a therapist via Skype for help with #ANXIETY & #DEPRESSION. http://t.co/f53kCEGXAB. Email me. Please Retweet!	1/12/2013 4:47:07 PM	Tweet	2	ANXIETY DEPRESSION		Online Therapist	Boulder CO, USA	http://t.co/A3Ve4p9NRS	Professional Mindfulness Therapist, Teacher & Author - Online Therapy via Skype for Anxiety, Panic Attacks, Depression, PTSD, Addictions & Emotional Well-Being.
405117856821424128	betseymerkel	Tks4YerFollow @TomWootton Assessment tools/stage-specific plans 2help ppl w/ #Depression http://t.co/cqY6IKQa05 create #ExtraordinaryLives	26/11/2013 10:36:38 AM	Tweet	0	Depression ExtraordinaryLives	TomWootton	Betsey Merkel	CLE	http://t.co/n82j8UAaEd	Tech-based Community & Economic Developer | Co-Founder @iopen2 | Principal ISIS #Creativity #Communications #OpenSystems #SocialProcess
405643542510714880	ifyjinamps	Intermedaites. CHEMICAL NAMES. CAS #depression NO. USAGE. [[ http://t.co/mIfkRZUAdn #melodifestivalen	27/11/2013 9:25:31 PM	Tweet	0	depression melodifestivalen		ifyjinamps	Portland		Just because you aren't where they are does not mean you don't have what it takes.
407282730322624512	MindfulnessMan	RT @MindfulnessMan: Online Therapy via Skype - Convenient and effective help for #ANXIETY & #DEPRESSION. http://t.co/nvhhM4G10U. Email me. …	2/12/2013 9:59:04 AM	Retweet	1	ANXIETY DEPRESSION	MindfulnessMan	Mindfulness Therapy	Boulder, CO, USA	http://t.co/zfZYQccFaI	Online Mindfulness Therapist, Teacher and Author of 'The Path of Mindfulness Meditation' - the application of mindfulness for healing emotional suffering.
406880983431282688	MentalHealth_UK	MHFTweets bring you HappyPlace Mood Manager #App for iOS. C112 #mhuk #mentalhealth #depression #mood #low	1/12/2013 7:22:40 AM	Tweet	0	App mhuk mentalhealth depression mood low	MHFtweets	Catherine	Edinburgh	http://t.co/8YmCP2eRih	#mhuk Founded 1998; Everything related to #mentalhealth | Business @MHScot_Consult | Works at @actondepression | Tw/RTs show interest not endorsement
405397079201034240	MindfulnessMan	Online Help to Overcome #Depression - Talk to a Therapist Online via Skype: http://t.co/3J0GEohaPp via @youtube. Contact me now! Please RT!	27/11/2013 5:06:10 AM	Tweet	0	Depression	YouTube	Mindfulness Therapy	Boulder, CO, USA	http://t.co/zfZYQccFaI	Online Mindfulness Therapist, Teacher and Author of 'The Path of Mindfulness Meditation' - the application of mindfulness for healing emotional suffering.
405220304378925056	nwohashtag	RT: [URSheepleWaKeUP] #ReTweet Watch "Dr. Umar Johnson: BLACK MALE #DEPRESSION & SUFFERING In SILENCE..." on #YouTube ...	26/11/2013 5:23:43 PM	Tweet	0	ReTweet DEPRESSION YouTube		#New World Order	Global		24hrs a Day this account monitors the internet for all news on the New World Order. Use #nwo to be tweeted here. @Follow for instant updates. RT please.
405430623507972099	KerrBop	RT @KerrBop: "What's it like to be depressed?" "It's like drowning but everyone sees you breathing" #depression #deepthoughts	27/11/2013 7:19:27 AM	Retweet	1	depression deepthoughts	KerrBop	Keri
405807914557767680	OnlineTherapy7	Skype Counseling Therapy Online - A better choice for #anxiety & #depression http://t.co/3KqI0MQfUj Schedule a session now. Please Retweet!	28/11/2013 8:18:41 AM	Tweet	0	anxiety depression		Online Therapist	Louisville, Colorado	http://t.co/7gNj8EQd	Online Mindfulness Therapist via Skype for Depression, Anxiety, Addictions, Stress & Relationship Problems. Contact me today to learn more.
406461964466937857	SkypeTherapist	Online Counseling Therapy for #Anxiety & #Depression via Skype: http://t.co/tEqsv1PRrC via @youtube. Email me. Please Retweet!	30/11/2013 3:37:38 AM	Tweet	0	Anxiety Depression	YouTube	Online Therapist	Boulder CO, USA	http://t.co/A3Ve4p9NRS	Professional Mindfulness Therapist, Teacher & Author - Online Therapy via Skype for Anxiety, Panic Attacks, Depression, PTSD, Addictions & Emotional Well-Being.
405281413131673600	ExeterTown	#Frankincense - Deep in History - Treat many medical conditions - #Depression - #Anxiety #Cancer & more! #PleaseVisit http://t.co/g3QSNpv7BJ	26/11/2013 9:26:33 PM	Tweet	0	Frankincense Depression Anxiety Cancer PleaseVisit		Exeter Town	Exeter	http://t.co/D5DM9en7aK	Exeter City is such a beautiful place - Old Exeter Town is full of history - #Win a holiday in Exeter for just a penny - see our profile link for details
405400523974914048	ShillingRyan	I don't understand what his deal is today. I think Tanner is depressed #depression http://t.co/R7ReDepcCK	27/11/2013 5:19:51 AM	Tweet	0	depression		Ryan Shilling			#duquesne #classof2017
406513408322703360	AnxietyNews	Military deployments tied to teens' #Depression http://t.co/4xEt8MLQk1	30/11/2013 7:02:03 AM	Tweet	0	Depression		Social Anxiety Help	USA	http://t.co/9z6sXqBXPG	Latest News, Treatment, Helpful Information For Those Of Us Battling Social Anxiety, GAD, Depression TOGETHER WE CAN HELP EACH OTHER, TOGETHER WE CAN GIVE HOPE!
407036455396327424	AcornProjectUK	RT @AcornProjectUK: #Frankincense - Deep in History - Treat many medical conditions - #Depression - #Anxiety #Cancer & more! #PleaseVisit h…	1/12/2013 5:40:28 PM	Retweet	1	Frankincense Depression Anxiety Cancer PleaseVisit	AcornProjectUK	The Acorn Project	Portland, United Kingdom	http://t.co/AW6FhpvE	From little acorns grow mighty Oak trees...
406125430853619712	PilatesFR	Spot That #Depression. http://t.co/Jvq50pOLMx #symptom #Suicide #motivation	29/11/2013 5:20:22 AM	Tweet	1	Depression symptom Suicide motivation		PilatesFR	Chicago, Illinois	http://t.co/aaZLXao4	Official account of @fitnessrepublic Pilates Section,supervised by @pilateslaurah
407427629340721152	Dead_Dragons	#migraine + #insomnia = #depression. Slept 22 hours in 9 days. Headache for 75hours. #NeedHelp	2/12/2013 7:34:51 PM	Tweet	0	migraine insomnia depression NeedHelp		Logan
405716025036898304	optimistlondon	Here, because several of you have commented on it, the scene where George tries to explain #depression to Theo: https://t.co/El3bI65Qnq	28/11/2013 2:13:32 AM	Tweet	0	depression		sebastian michael	london & the world	http://t.co/Z3oi3yavfZ	i create theatre, film, video and crossovers as a writer, director, producer and sometimes actor. i've also written a novel. and i occasionally blog.
405704621789679616	Vidant_Health	Holidays can be hard for some. We’re here if you need us: http://t.co/3nsGVX4rgf havioralhealth/ #depression #MentalHealth	28/11/2013 1:28:14 AM	Tweet	0	depression MentalHealth		VidantHealth	Greenville, NC	http://t.co/YWqAvsoXVA	Vidant Health is a mission-driven, not-for-profit health system in eastern North Carolina.
406379451921219584	Daniel_L_Baker	RT @Daniel_L_Baker: If you're suffering from #depression or know someone who is, download my FREE e-book at http://t.co/oi3n2PobPL http://t…	29/11/2013 10:09:46 PM	Retweet	9	depression	Daniel_L_Baker	Danny Baker	Sydney, Australia	http://t.co/oi3n2PobPL	Author and founder of the Depression Is Not Destiny Campaign. Get your FREE copy of my tell-all memoir, The Danny Baker Story, at my website today.
405263742902206464	CharitySANE	RT @CharitySANE: A favourite thought for the day: #mentalhealth #BlackDogCampaign #oneinfour #MHUK #depression #MH #1in4 http://t.co/QOeb4v…	26/11/2013 8:16:20 PM	Retweet	16	mentalhealth BlackDogCampaign oneinfour MHUK depression MH 1in4	CharitySANE	SANE	London, UK	http://t.co/OVkNj7KGam	SANE improves quality of life for anyone affected by mental health problems, including family, friends and carers
405956580635467777	LundquistNoah	Sometimes I really can't believe the shit that happened. #Depression	28/11/2013 6:09:25 PM	Tweet	0	Depression		mctitties.			I ride little kid bikes. Bc i have no freinds.
406310037116952576	VRamadhayanty	#sorrow #depression http://t.co/fy4LcrEjH8	29/11/2013 5:33:56 PM	Tweet	0	sorrow depression		Vica	Serdam komp. griya husada	http://t.co/vROQGly5hh	Waiting 10january..| ZeinNuryahyaPA♥ | path/ig: vicaramadhayanty
406757625817481216	Tamralynnsmith	How to climb out of... http://t.co/M6W7UvfrSX #Authors #book #depression #kids #stress	30/11/2013 11:12:29 PM	Tweet	0	Authors book depression kids stress		Tamra Lynn Smith	Surprise Arizona	http://t.co/NaXb2fjbxT	Proud Army Mom, grandma, indie hit songwriter, founded projecttroops.org, writes 4 tipsforlove.net, new book out on life & love advice with Professor Nagle
405268203133100032	Sport_Bokkie	How hard has depression hit cricket? http://t.co/muMwByjgW4 via @guardian #sportspsychology #depression	26/11/2013 8:34:03 PM	Tweet	0	sportspsychology depression	guardian	Simone do Carmo			Physiology & Sports Science student at the University of Glasgow Scientific mind in a sporting body
405870494140076032	MahaliaFreedND	Mushroom cookies for happiness. And nerve regeneration, memory, & cognition. #depression #dementia http://t.co/9so5qgGWRb #naturalhealth	28/11/2013 12:27:21 PM	Tweet	0	depression dementia naturalhealth		Dr Mahalia Freed, ND	Toronto (Broadview & Danforth)	http://t.co/EAJurT2c	Naturopathic doctor, Reiki Master, BodyTalk Practitioner, Kale Crusader. Witness, Coach, Detective, Cheerleader, Healer. Tweeting #herbs & #naturalhealth news.
405859211332304896	bethnoBETH	For my friends... #iamhere #iloveyou #love #depression #strength #strong #need http://t.co/5dKy8uUw4k	28/11/2013 11:42:31 AM	Tweet	0	iamhere iloveyou love depression strength strong need		Sic Transit Gloria	London	http://t.co/hIMHLzBth3	An actress, a dancer, a former romantic and a poet.
406318963828588544	osaxy	Look for the light...... #SLDquote© #Lupus #spoonie #Fibro #rheum #ChronicPain #depression http://t.co/UFpWkVLTBL	29/11/2013 6:09:24 PM	Tweet	1	SLDquote Lupus spoonie Fibro rheum ChronicPain depression		Sheri (LupusDiva)	Middle of California, USA		Survivor Domestic violence/Lupus/Fibro etc. Lv writing/reading/music/racing.Musician. Lv God/husband/kids.Laughter helps! #SLDquote© r mine! Lv 2 share them!
406755865031901184	hahacalumhood	♥ #underlinedheartproject #selfharm #ed #depression #suicidal #abuse #youarenotalone http://t.co/9EbJpEX7jR	30/11/2013 11:05:30 PM	Tweet	0	underlinedheartproject selfharm ed depression suicidal abuse youarenotalone		is it hi or hey	Singapore ugh // 0/4		What's crackalakin ? ♡
405249100087848960	Ambertarian	#Depression is common in early #recovery. Do you know how to help someone (or yourself) cope? http://t.co/eqyev4vJLY #xa #familydisease	26/11/2013 7:18:09 PM	Tweet	0	Depression recovery xa familydisease		ambertarian	Universe	http://t.co/kMHahS0KYY	Onwards, to a sustainable model for human beings: family structure, true self-realization in a Universal context, spiritual growth & enlightenment.
406551144953954304	Daniel_L_Baker	#Depression: where some days surviving is a big achievement. That's not "just being sad". That's having a bone fide illness. #MentalHealth	30/11/2013 9:32:00 AM	Tweet	24	Depression MentalHealth		Danny Baker	Sydney, Australia	http://t.co/oi3n2PobPL	Author and founder of the Depression Is Not Destiny Campaign. Get your FREE copy of my tell-all memoir, The Danny Baker Story, at my website today.
406905047537418240	Servants5	How to Hold on When Everything is Shaking- Reaching for bedrock to keep from going in #depression http://t.co/4zqD05fTou #Grief #Despair	1/12/2013 8:58:17 AM	Tweet	0	depression Grief Despair		Apostolic Servants	Global	http://t.co/QbI40jOIbX	Building the Global Body of Christ by Serving His Leadership. We are a band of brothers and sisters who love Jesus and one another. Chief Editor @JoseBosque
405436098983108609	MindfulTherapy4	Online Counseling Therapy for #Anxiety & #Depression via Skype: http://t.co/9414BPyJi6 via @youtube. Please email me. Please Retweet!	27/11/2013 7:41:13 AM	Tweet	0	Anxiety Depression	YouTube	Mindfulness Therapy	Boulder, Colorado	http://t.co/Zdqq3ID5Zk	Online Mindfulness Therapist via Skype - providing Professional Online Therapy for problems with Anxiety, Depression, Stress, Addictions and Relationships.
407389609618731008	Daniel_L_Baker	RT @Daniel_L_Baker: The cycle of #depression: http://t.co/zCdZSZYFbf	2/12/2013 5:03:46 PM	Retweet	5	depression	Daniel_L_Baker	Danny Baker	Sydney, Australia	http://t.co/oi3n2PobPL	Author and founder of the Depression Is Not Destiny Campaign. Get your FREE copy of my tell-all memoir, The Danny Baker Story, at my website today.
406666345325944833	KristinBower	Are you a member of the club? Adventures of a Survivor!: "All Around the World" http://t.co/ywP42VwwOt #depression	30/11/2013 5:09:46 PM	Tweet	0	depression		Kristin Bower	Vancouver, BC	http://t.co/f2gqgXnoA8	Vancouver girl, mental health advocate, HR pro devoted to making the world a better place, one smile or comforting word at a time!
405798274965069824	MLArszman	[Blog] Link Love: Good Reads on #Depression, #CrossFit, #Dogs, & more! http://t.co/4VccaBH4ux #elf4health (@FitApproach) #fitblog	28/11/2013 7:40:22 AM	Tweet	1	Depression CrossFit Dogs elf4health fitblog	FitApproach	Megan Arszman	Lexington, Ky.	http://t.co/CsUXpMxm1A	Animal lover, Freelance writer, dog agility enthusiast, #CrossFit, #runner, wife, Colts & Notre Dame fan, & lifelong horsewoman.
405246786047987712	That_Jeff_Guy	Stephen Harmison #thankyou for opening up @ECB_cricket http://t.co/c1x63QU0MT #Ashes #cricket #depression	26/11/2013 7:08:57 PM	Tweet	0	thankyou Ashes cricket depression	ECB_cricket	Jeff Guy	Sydney - Australia
406151210312278016	GSWSyndicate	#Herb #kratom successful 4 #migraine #depression #anxiety http://t.co/z1AMknFWWp @KratomK http://t.co/zVJtVEcnHE Code “kratom” get 15% off	29/11/2013 7:02:49 AM	Tweet	0	Herb kratom migraine depression anxiety	KratomK	GSWSyndicate	New Orleans, LA	http://t.co/VYj93S8YMM	From Grisham to BB King the best southern (and now worldwide) writer's, philosophers, artist's etc quotes We proudly represent @RickLondon & @LeeHillerLondon.
405729131683262464	KatesNewMoon	#didimention that I #hate this time of year? #depression	28/11/2013 3:05:37 AM	Tweet	0	didimention hate depression		KatesNewMoon	limbo		Mainly because knowing about that would involve knowing some pathetic,ridiculous,and absolutely true things about myself that Id rather not admit to right now.
405629299312824320	twittingtonb	RT @twittingtonb: Please RT http://t.co/xzeP4oMvgf #depression #anxiety #addiction #alcoholic #drugs #stress #manic #bipolar #abuse #sad #…	27/11/2013 8:28:55 PM	Retweet	1	depression anxiety addiction alcoholic drugs stress manic bipolar abuse sad	twittingtonb	Adam	Bristol	http://t.co/xzeP4oMvgf	Second Asst. Director - I do my best work alone - my brain is like the fat kid on a playground - it doesn't like to share!!
405111916777185280	ZeanaRomanovna	#Art of #Depression - honoring everyone who has or who is #sad and #depressed. http://t.co/ypSIqitqkP puuT	26/11/2013 10:13:02 AM	Tweet	0	Art Depression sad depressed		Romanovna Fine Art	AU USA or UK	http://t.co/vavwi0kULS	Mixed Media #Artist that works in many differing mediums with an emphasis on commisions and affordable prints. http://t.co/4awtVkqNqY
406695797565440000	PrendergastLj	pinquotes #violin #orchestra #depression #upset #anxiety #paranoia #paranoid #crying #longweekend… http://t.co/D8vHIZYugK	30/11/2013 7:06:48 PM	Tweet	1	violin orchestra depression upset anxiety paranoia paranoid crying longweekend		laura prendergast
405341793048203264	managing_stress	Stressing the Stress in Sport. Dr. Thompson blogs http://t.co/M56tXkq48N #JonathanTrott #stress #depression #anxiety #mentalhealth	27/11/2013 1:26:29 AM	Tweet	0	JonathanTrott stress depression anxiety mentalhealth		Stress Management		http://t.co/iyOXooAHuE	A team of Clinical & Counseling Psychologists have developed a Stress Management App. The app employs evidence-based psychological tools.
406256180693303296	XOXORubenHaze	#Depression #Sadness #Loneliness #Socks #HateMyLife #FuckYouAll I've come to a realization ; I care… http://t.co/A659VaGwfp	29/11/2013 1:59:56 PM	Tweet	0	Depression Sadness Loneliness Socks HateMyLife FuckYouAll		.	I wish i was in Cali x/3	http://t.co/Eal3xxizqA	IG - Pato_Rican ; C/O 2O14 ; TeamGay
405985246585163776	JULIESH58555675	#personalyoga in your own home #ambervalley helps recovery from illness including #depression & #anxiety 07528 322975 #ripleyandheanor	28/11/2013 8:03:20 PM	Tweet	0	personalyoga ambervalley depression anxiety ripleyandheanor		YOGA & COUNSELLING	YOGA, AMBER VALLEY, DERBYSHIRE	http://t.co/qh8awsOyZ7	Local friendly and welcoming yoga classes for all abilities, shapes and sizes! BIRTHLIGHT pregnancy classes. COUNSELLING in The Counselling Room at Swanwick
406977010569736192	punkinhead555	RT @punkinhead555: I have not wanted to talk to anyone all day #depression #ohwell	1/12/2013 1:44:15 PM	Retweet	1	depression ohwell	punkinhead555	Lexi Levene
405104501595467776	tecvocjohn	This isnt right its not fair #familyproblems #depression	26/11/2013 9:43:34 AM	Tweet	0	familyproblems depression		John Goodman
407374140274794496	WomanVote	Check out "Schizophrenia Documentary" on #Vimeo http://t.co/8Zq0TV5ihJ #mentalillness #schizophrenia #depression #breakdown #MentalHealth	2/12/2013 4:02:18 PM	Tweet	0	Vimeo mentalillness schizophrenia depression breakdown MentalHealth		Woman Voter	EARTH	https://t.co/J6VvVtaguD	Woman Voter,supports HR676,FOIA,FreeSpeech,FreePress,NetAccess, HumanRights,Democracy,Freedom &VotingRights. http://t.co/bNKAq1kfE5 http://t.co/Zk0M6jPdaQ
407010272813907968	2BipolarChicks	According to WHO, nearly 1 million people take their own lives every year, more than those who are murdered. #depression #suicide #health	1/12/2013 3:56:25 PM	Tweet	2	depression suicide health		TwoBipolarChicks	NJ		Authors Wendy K. Williamson and Honora Rose 'tweet' their ways to stay healthy with Bipolar Disorder. Their book, 66 Tips by The Two Bipolar Chicks out 2-1-2014
405805261136207873	DoctorAdams	http://t.co/0eihKX41ER #AtlantaMedicalPsychology #Dr. David B. Adams #Pain #Depression #Anxiety	28/11/2013 8:08:08 AM	Tweet	0	AtlantaMedicalPsychology Dr Pain Depression Anxiety		Dr. David B. Adams	Atlanta, GA	http://t.co/vuDaUl0IcT	Dr. David B. Adams is Board Certified in Clinical Psychology specializing in the treatment of pain, mood, anxiety, sexual, psychosomatic & somatoform disorders
406665525662859264	papakelt	RT @papakelt: Kids’ Frequent Tummy Aches Linked to Adult #Anxiety, #Depression | Psych Central News http://t.co/PebXRSVpKL #mentalhealth	30/11/2013 5:06:31 PM	Retweet	1	Anxiety Depression mentalhealth	papakelt	Gerard Newham	Sydney, Australia	http://t.co/IpsHE27BG9	Alcohol & other drug, mental health, inmate issues, criminal justice, social justice, homelessness, pro-vax, skeptic. RT indicates interest not agreement.
405288470731427840	dhenizen	Seriously i think ive been pigging out lately. #eatingdisorder #depression #foodfeast	26/11/2013 9:54:35 PM	Tweet	0	eatingdisorder depression foodfeast		dencio_bonito	Neverland	http://t.co/u7W3FPns1f	a VICTOR! http://t.co/pPQ3mWkDfm http://t.co/cIsLZXcIuG
405891511079813120	SkypeTherapist	RT @SkypeTherapist: Online Cognitive Therapy (CBT) for #Depression. Talk to a Mindfulness therapist via Skype. http://t.co/ykzYPLfpyH. Emai…	28/11/2013 1:50:52 PM	Retweet	1	Depression	SkypeTherapist	Online Therapist	Boulder CO, USA	http://t.co/A3Ve4p9NRS	Professional Mindfulness Therapist, Teacher & Author - Online Therapy via Skype for Anxiety, Panic Attacks, Depression, PTSD, Addictions & Emotional Well-Being.
406178587935387648	OnlineTherapy7	Online Therapy for #Depression. Talk to therapist via Skype for effective help. http://t.co/PcGNW4qTo9. Email me. Please Retweet!	29/11/2013 8:51:36 AM	Tweet	0	Depression		Online Therapist	Louisville, Colorado	http://t.co/7gNj8EQd	Online Mindfulness Therapist via Skype for Depression, Anxiety, Addictions, Stress & Relationship Problems. Contact me today to learn more.
406264167034023936	craig_denholm	Feel like I'm on the verge of fucking my life up #depression	29/11/2013 2:31:40 PM	Tweet	0	depression		craig denholm	Newcastle		Obsessed is a word lazy people use to describe the dedicated
406424222287036417	HampshireCB	RT @HampshireCB: #depression & #cricket by Mike Brearley in #WisdenAlmanack &amp; @MDCroweMentor on #ESPNcricinfo http://t.co/tISqgbYUJh http…	30/11/2013 1:07:40 AM	Retweet	1	depression cricket WisdenAlmanack ESPNcricinfo	HampshireCB MDCroweMentor	Hants Cricket Board	SO30 3XH	http://t.co/BXvBe8FaHq	Hampshire Cricket Board Ltd (HCB) is responsible for all recreational cricket in the county: providing a cricketing future for all
407440738830790656	kimberb1	RT @kimberb1: Growing up in a hostile/abusive home left me with long lasting issues like #depression #anxiety #ian1 http://t.co/bl9OdU7zqC	2/12/2013 8:26:56 PM	Retweet	17	depression anxiety ian1	kimberb1	kimberly biller#ian1	murrells inlet south carolina	http://t.co/9BuioQea9a	#IAN1 #asmsg Find me on Amazon. I Couldnt Lay In The Bed They Made: memoir of a child bride. Erotica w/a twist titled Musings Between The Sheets
408130147796414464	ColumbiaPsych	RT @ColumbiaPsych: symptoms of SAD include tiredness, fatigue, #depression, crying spells, mood swings, trouble concentrating, #insomnia, …	4/12/2013 6:06:24 PM	Retweet	2	depression insomnia	ColumbiaPsych	Columbia Psychiatry	New York, N.Y.	http://t.co/ytLoS7ySJ1	Dedicated to finding the causes and cures for mental illness. Find out about our research studies at 212-305-6001
406461223333421056	AudenisKapuni	My weakness is that,,, I care too much,es #MyQuotes #Hotbath #Bath #Noble #Deeds #Cure #Depression #OneLiners}	30/11/2013 3:34:42 AM	Tweet	0	MyQuotes Hotbath Bath Noble Deeds Cure Depression OneLiners		Kapuni Audenis	Nebraska city, NE, USA		Am a graduate of history and international studies and am an artiste am into afro hiphop
405712685339127810	donmunro	#poetry #writing #amwriting #poem #depression #longislandpoets: Read why a coffee machine is like #anxiety: http://t.co/YP1muW8rZ2	28/11/2013 2:00:16 AM	Tweet	0	poetry writing amwriting poem depression longislandpoets anxiety		don munro	New York	http://t.co/Z1tHxHfwyq	Amateur in poetry ... As in life. Copyrighted stuff, of course, baby.
406781051055255552	farmradio	RT @farmradio: Our latest #AudioPostcard features our work w/ @gchallenges addressing #youth #depression through #radio in #Malawi. http://…	1/12/2013 12:45:34 AM	Retweet	2	AudioPostcard youth depression radio Malawi	farmradio gchallenges	Farm Radio Intl	Ottawa, Ontario, Canada	http://t.co/LCR3l7G1r3	A Canadian not-for-profit organization working in partnership with 460+ radio partners in 38 African countries. Donate to support us: http://t.co/4DhgXX9Goy
406422269289066496	drflanders	RT @drflanders: MT @CAMHnews: Fathers can also develop #postpartum #depression? Learn about research in dual parental depression http://t.c…	30/11/2013 12:59:54 AM	Retweet	1	postpartum depression	drflanders CAMHnews	Dr. Daniel Flanders	Toronto, Canada	http://t.co/IHx9z9cL67	Dad. Husband. #Pediatrician w/special interest in #PrimaryCare, #nutrition, #obesity, feeding problems & #EatingDisorders. I work at @kindercarepeds & @kidecare
405101864246837248	butifnot	RT @butifnot: "This has given me a little more courage to face each new day.” Claudia http://t.co/iiUvnJOXM7 #ASMSG #depression http://t.co…	26/11/2013 9:33:05 AM	Retweet	19	ASMSG depression	butifnot	butifnot	Minnesota	http://t.co/KhMO69DKHT	Child of the King, wife, mother, grandmother, great grandmother, writer, speaker and digital scrapbooker.
405324893975093248	OnlineTherapy7	Online Cognitive Therapy (CBT) for #DEPRESSION & #ANXIETY. Talk to a Therapist via Skype. http://t.co/NUK89mxWgw. Email me. Please Retweet!	27/11/2013 12:19:19 AM	Tweet	0	DEPRESSION ANXIETY		Online Therapist	Louisville, Colorado	http://t.co/7gNj8EQd	Online Mindfulness Therapist via Skype for Depression, Anxiety, Addictions, Stress & Relationship Problems. Contact me today to learn more.
406568378292518912	depressiontc	What it's like having postpartum depression? #postpartum #depression http://t.co/Hm49t5Dfrr	30/11/2013 10:40:29 AM	Tweet	0	postpartum depression		Depression Treatment	Los Angeles, CA	http://t.co/qiGLZKQt	Providing free info on depression treatment centers across the nation. We give assistance to those decided to do something about it and take the first step.
406465456132726784	HospitalPatient	Short Tip 4 Handling #Holiday #Depression with a #Chronic #Disease WATCH http://t.co/rGMnUjMpAF #hcsmca #hcsmeu #epatient #hcsmse	30/11/2013 3:51:31 AM	Tweet	0	Holiday Depression Chronic Disease hcsmca hcsmeu epatient hcsmse		Michael A. Weiss	West Orange, NJ	http://t.co/djLsqHHxeI	30-yr #Crohn's #Disease Patient/multimedia Advocate. Founder of #Crohn's Disease #Warrior Patrol matching #IBD patients w/ each other 4 Support, Info & TLC.
406442077392613376	JadePotterMore	You can work on #depression and start to feel better, but when you lose someone whilst trying to recover, how do you deal with grief too	30/11/2013 2:18:37 AM	Tweet	0	depression		Jade Wood	Stafford		Jade--- Skype~ jade-louise122
406325316622499840	MHTuz	Your #MentalHealth by Dr. Paul Latimer http://t.co/uf18hUS9fu #bipolar #Depression #data #treatment http://t.co/VMflBES372	29/11/2013 6:34:39 PM	Tweet	0	MentalHealth bipolar Depression data treatment		#MentalHealth			Latest news about #MentalHealth.
405421679381188608	OnlineTherapy77	Internet Therapy via Skype for effective help with #ANXIETY & #DEPRESSION. http://t.co/AxNwmEVkRX. Email me. Please Retweet!	27/11/2013 6:43:55 AM	Tweet	0	ANXIETY DEPRESSION		Online Therapist	Boulder, Colorado	http://t.co/jbtxSVIa	Online Mindfulness Therapy via Skype for Anxiety & Panic Attacks, Depression and Stress, Addictions & Eating Disorders. Email inquiries welcome.
405700358996914176	GEHealthcare	New study links #depression to #Parkinson’s http://t.co/I9A9QJ36Ki	28/11/2013 1:11:17 AM	Tweet	2	depression Parkinson		GE Healthcare	UK, global headquarters	http://t.co/ovYgeHerWG	GE Healthcare official account. Emerging health trends, innovations & challenges in healthcare delivery.
406665213832744960	PTSDNet	Online Help to Overcome #Depression - Talk to a Therapist Online via Skype: http://t.co/fNmgmwvvCK via @youtube. Contact me now! Please RT!	30/11/2013 5:05:17 PM	Tweet	0	Depression	YouTube	Online Therapist	Boulder, Colorado, USA	http://t.co/Yql2ImFvdV	Professional Online Mindfulness Therapist offers Online Therapy via Skype for Anxiety, Depression, PTSD, Stress & Addictions. Contact me to schedule a session.
407417171199807488	zackpeterson3	RT @zackpeterson3: Why is late at night I think way to much and it just makes me depressed?#depression	2/12/2013 6:53:17 PM	Retweet	1	depression	zackpeterson3	zack peterson	columbus oh		I'm a sports a band kid.
405388037409890304	Our_Depression	"Every day begins with an act of courage and hope: getting out of bed." Mason Cooley #chronicallyawesome #mentalhealth #depression	27/11/2013 4:30:14 AM	Tweet	0	chronicallyawesome mentalhealth depression		Our Depression		http://t.co/8P0R8ZQ9VE	Our Depression, a member of the #ChronicallyAwesome Family of support sites. Visit us at http://t.co/LOWUxaZ007
405638818831015936	Quinonostante	RT @Quinonostante: Thanks to @GrassrootsSP - love the nest. A #MentalHealth must share. #depression http://t.co/IFwQrqAGB1	27/11/2013 9:06:45 PM	Retweet	1	MentalHealth depression	Quinonostante GrassrootsSP	Dawn Willis	A Geordie in DEVON..	http://t.co/Dpr3Gp9ppe	Political Agitator and Active Mental Health /Disability Campaigner. Professional Campaigns Manager & Mental Health Awareness Trainer.
405629572483276800	manda_Melbourne	For those who have #depression Suicide may have crossed your mind to end the pain. It certainly crossed mine: http://t.co/SPPcK6CUXY	27/11/2013 8:30:00 PM	Tweet	0	depression		Amanda Harper	Melbourne, Australia	http://t.co/SPPcK6CUXY	Mum / Writer / Social Media Artist / Online Content Producer ♍️
406651659813535745	MindfulTherapy4	Counseling Therapy Online via Skype - Providing effective help for #ANXIETY & #DEPRESSION. http://t.co/1G47W25LBe. Email me. Please Retweet!	30/11/2013 4:11:25 PM	Tweet	0	ANXIETY DEPRESSION		Mindfulness Therapy	Boulder, Colorado	http://t.co/Zdqq3ID5Zk	Online Mindfulness Therapist via Skype - providing Professional Online Therapy for problems with Anxiety, Depression, Stress, Addictions and Relationships.
407429165382893568	Daniel_L_Baker	RT @Daniel_L_Baker: This is exactly why we need to raise awareness about #depression: http://t.co/LQeR17QkOJ	2/12/2013 7:40:57 PM	Retweet	7	depression	Daniel_L_Baker	Danny Baker	Sydney, Australia	http://t.co/oi3n2PobPL	Author and founder of the Depression Is Not Destiny Campaign. Get your FREE copy of my tell-all memoir, The Danny Baker Story, at my website today.
405865673584553985	ViktorFranklFan	Dr. Levinson says, "People who commit #suicide are suffering from #mentalillness." http://t.co/cFLK0UrDee #depression #hopeless	28/11/2013 12:08:11 PM	Tweet	0	suicide mentalillness depression hopeless		Viktor Frankl Movie	California & Vienna	http://t.co/p9pPnCFr7O	Alexander Vesely, grandson of Viktor Frankl directs this new movie about the life of Viktor Frankl. Learn more at http://t.co/qp9aPTjG.
405436307926577152	AmandaGreenUK	RT @AmandaGreenUK: #MyAlienSelf #truestory A woman's journey in and out of #mentalillness #BPD #OCD #Depression #anxiety http://t.co/przSau…	27/11/2013 7:42:03 AM	Retweet	2	MyAlienSelf truestory mentalillness BPD OCD Depression anxiety	AmandaGreenUK	Amanda Green, Author	England	http://t.co/FIEo4mq2cc	Author of #Memoir #MyAlienSelf my journey back to me and sequel '39' Mental illness Anti-stigma Advocate.BPD/depression/OCD recovery.Save Orangutan #Cat owner
407383269135499264	apoemaday	@AmySafran #Care for your #elders? I did this film for them! What do you think? https://t.co/DXxgjtNMnO #depression #ageing #love	2/12/2013 4:38:34 PM	Tweet	0	Care elders depression ageing love	AmySafran	Jean Mercier	Montreal, Canada	https://t.co/qPjoZ6vuOc	+ 1,440,000 FANS on FB! Love Notes for the Soul since 2003! © Poems by Jean Mercier. Photos by Junichiro Kuniyoshi. Books now available! ReTweet with love!
405277632314355712	mnt_depression	RT @mnt_depression: Antidepressants are not 'happy pills' http://t.co/gPV0WPfd3B #depression	26/11/2013 9:11:31 PM	Retweet	1	depression	mnt_depression	MNT Depression News	United States	http://t.co/uOPcg6lKcz	The latest depression news published daily. Articles from research centers, universities and prestigious journals.
405438962828734464	OnlineTherapy77	Online Cognitive Therapy (CBT) for #Depression. Talk to a Mindfulness therapist via Skype. http://t.co/o3aUHzDFaG. Email me. Please Retweet!	27/11/2013 7:52:36 AM	Tweet	0	Depression		Online Therapist	Boulder, Colorado	http://t.co/jbtxSVIa	Online Mindfulness Therapy via Skype for Anxiety & Panic Attacks, Depression and Stress, Addictions & Eating Disorders. Email inquiries welcome.
405398305360072704	BioMedCentral	RT @BioMedCentral: A sad heart is a bad heart. Major #depression may contribute to 3% of global ischemic #heart disease, yikes! - http://t.…	27/11/2013 5:11:02 AM	Retweet	9	depression heart	BioMedCentral	BioMed Central	London,UK	http://t.co/ObcAV9Br0x	The Open Access Publisher. Most tweets by @justbalmy and @roobina
405795676727947265	PABHP	#RiskManagement & Medical Treatment, old med's are finding new ways to help; http://t.co/8t1Pbuphhn #Depression http://t.co/EdrQbgSAov	28/11/2013 7:30:03 AM	Tweet	0	RiskManagement Depression		theHelpPoint.net	Toronto, Canada	http://t.co/4bRK7iVaBh	Employee-Employer Communication Tool via computer or mobile device: instantly send issues or suggestions, has full report suite for follow up. Easy & affordable
406569261269016576	AuntieDolores	RT @AuntieDolores: #Cannabis is still used to #treat #depression in #Moracco. http://t.co/1q9GFdgcCf	30/11/2013 10:44:00 AM	Retweet	3	Cannabis treat depression Moracco	AuntieDolores	Auntie Dolores	Oakland, CA	http://t.co/8ASPgPTZiT	We make medical cannabis edibles. We're happy to provide legal medical cannabis patients with the Good Taste Of Medicine.
405089914108125184	MindfulTherapy4	Online Help to Overcome #Depression - Talk to a Therapist Online via Skype: http://t.co/zYOTx0ruVy via @youtube. Contact me now! Please RT!	26/11/2013 8:45:36 AM	Tweet	0	Depression	YouTube	Mindfulness Therapy	Boulder, Colorado	http://t.co/Zdqq3ID5Zk	Online Mindfulness Therapist via Skype - providing Professional Online Therapy for problems with Anxiety, Depression, Stress, Addictions and Relationships.
405723106364637184	ZeanaRomanovna	Despair - The Nude In Sadness - Zeana Romanovna - #Sadness #Painting #Sorrow #Depression #Loss #Artwork http://t.co/13W5QKicHr TifH	28/11/2013 2:41:41 AM	Tweet	0	Sadness Painting Sorrow Depression Loss Artwork		Romanovna Fine Art	AU USA or UK	http://t.co/vavwi0kULS	Mixed Media #Artist that works in many differing mediums with an emphasis on commisions and affordable prints. http://t.co/4awtVkqNqY
407319725220179968	Cheyenne_Lecter	RT @Cheyenne_Lecter: #poetry #depression #getmeoutofhere #canibe18yet #catsaresmart #noticeme #helpme #fuckholidays #stillthankful #hashtag…	2/12/2013 12:26:04 PM	Retweet	1	poetry depression getmeoutofhere canibe18yet catsaresmart noticeme helpme fuckholidays stillthankful hashtag	Cheyenne_Lecter	Chey	Perris Ca		i am a loser sooo follow me? :)
407254179095523329	Sophie_Katic	#i #will #always #be #here #for #you #they #said ... #then #they #left #depression #suicide… http://t.co/RWMfTkIzcy	2/12/2013 8:05:37 AM	Tweet	0	i will always be here for you they said then they left depression suicide		#itsalovestory	Canada	http://t.co/Obobf2oioo	15| Castle | NCIS LA | Criminal Minds | @Stana_Katic @ericcolsen @DanielaRuah, Music ♥♥
405867689375059969	ViktorFranklFan	30-40% of #students tell counselor Cynthia Evans they can't continue their life http://t.co/Ha5fS0KwL8 #suicide #depression	28/11/2013 12:16:12 PM	Tweet	0	students suicide depression		Viktor Frankl Movie	California & Vienna	http://t.co/p9pPnCFr7O	Alexander Vesely, grandson of Viktor Frankl directs this new movie about the life of Viktor Frankl. Learn more at http://t.co/qp9aPTjG.
406821115164491778	BestTherapy4U	Online Counseling Service available via Skype - Helping you manage #ANXIETY & #DEPRESSION. http://t.co/GAekjPPlkC. Email me. Please Retweet!	1/12/2013 3:24:46 AM	Tweet	0	ANXIETY DEPRESSION		Online Therapy	Boulder, Colorado, USA	http://t.co/d8Y659ZCRi	Professional Mindfulness Therapist. I provide Online Mindfulness Therapy via Skype for Depression, Anxiety, Addictions & Relationship problems.
405739869667749888	RodriguezRaquel	Birthday Surprise! It's Denise. http://t.co/zglNX5n6Lq #loneliness #depression #anxiety #hope #retweet	28/11/2013 3:48:17 AM	Tweet	0	loneliness depression anxiety hope retweet		Raquel Rodriguez	somewhere over the rainbow	http://t.co/ezEBuF2OIN	Loving God, people, and laughing.
405684011219296256	kkimberley	RT @kkimberley: Anyone suffering with #anxiety + #depression try reading Dr Windy Dryden 10 Steps to Positive Living a great help along wit…	28/11/2013 12:06:20 AM	Retweet	1	anxiety depression	kkimberley	Karen Kimberley	Taplow, Maidenhead	http://t.co/1ojfaiJl6P	Are you looking to build communication, confidence, + capability in business? 1000's have benefited from our coaching and therapy in NLP, CBT + hypnotherapy
405411037887086593	TravisAaronA	Surviving Medical School: Part 4 - Isolation - News - Bubblews #bubblews #sadness #depression #lonely #sad #medicine http://t.co/pbAPuPETEf	27/11/2013 6:01:38 AM	Tweet	0	bubblews sadness depression lonely sad medicine		Travis Aaron A		http://t.co/hrLnJZazZB	Pop Culture † Gaga † Others
405251043769847808	Paul_in_Aber	Cricketer Iain O'Brien on #bbcbreakfast talking about #depression made excellent observation 'you need to learn to interact with yourself'	26/11/2013 7:25:52 PM	Tweet	0	bbcbreakfast depression		Paul Kenton	Aberystwyth		Cell Biologist, music lover, and someone who ought to know better at his age.
405854240729759744	QuotenInstagram	New #quote : #depressed #depressing #depression #quote #sad #alone #lost #lonely #hurt #failure #followme by _sim... http://t.co/vGCa2vsDfk	28/11/2013 11:22:46 AM	Tweet	0	quote depressed depressing depression quote sad alone lost lonely hurt failure followme		Instagram Quotes	Life	http://t.co/dE63Ds5g0n	Hey, You Can Find In This Twitter Account All The POst On Instagram With The Tag #quote Enjoy Browsing Thousands Of Quotes Just Through Twitter
405108562239578112	beanbean102	Just feeling like I should just end it all. #depression	26/11/2013 9:59:42 AM	Tweet	0	depression		brieanna rosario
405358374445154306	RickStrandlof	That thing where everything is going right and my #depression makes me.want to die. #mhchat #mhsm	27/11/2013 2:32:22 AM	Tweet	0	depression mhchat mhsm		Rick Strandlof	VAN/DEN/LA		Angel in a (bipolar) earth suit. #TeamPug Rider of Bikes. Lover of Gingers. #TeamGay Social Media Director @artfromashes
405767076117094401	WiseCarePtyLtd	Please check out our updated website http://t.co/4M57nZCauL new #training days #agedcare #depression #anxiety #dementia. Have a great day!!	28/11/2013 5:36:24 AM	Tweet	1	training agedcare depression anxiety dementia		Seamless Ageing	Sydney, Australia	http://t.co/f09jCcrFj4	team of experienced psychologists assisting 50+ adults with role transitions; changes in health & living circumstances, focusing on active + positive ageing
405299582168346625	MindfulTherapy4	Online Help for #Depression - Talk to a Therapist Online via Skype: http://t.co/zYOTx0ruVy via @youtube. Contact me now! Please RT!	26/11/2013 10:38:45 PM	Tweet	0	Depression	YouTube	Mindfulness Therapy	Boulder, Colorado	http://t.co/Zdqq3ID5Zk	Online Mindfulness Therapist via Skype - providing Professional Online Therapy for problems with Anxiety, Depression, Stress, Addictions and Relationships.
405946607230648321	OnlineDisciple1	How to Hold on When Everything is Shaking- Reaching for bedrock to keep from going in #depression http://t.co/3qNmnByqN9 #Grief #Despair	28/11/2013 5:29:47 PM	Tweet	0	depression Grief Despair		Online Disciples	Global	http://t.co/uzuGGuwVaY	Using 21st Century tools to train and equip Christian Leaders Worldwide. Global Video Conferencing & Chat- with a Prophetic, Apostolic & Kingdom Church view
405392352476286976	OnlineTherapy7	Online Counseling Therapy for #Anxiety & #Depression via Skype: http://t.co/2eN9GfNZTR via @youtube. Please email me. Please Retweet!	27/11/2013 4:47:23 AM	Tweet	0	Anxiety Depression	YouTube	Online Therapist	Louisville, Colorado	http://t.co/7gNj8EQd	Online Mindfulness Therapist via Skype for Depression, Anxiety, Addictions, Stress & Relationship Problems. Contact me today to learn more.
405776596272828416	j_kostelnik	Every passing moment that brings me closer to working tonight is like a tiny little present of #anxiety and #depression	28/11/2013 6:14:14 AM	Tweet	0	anxiety depression		Josh Kostelnik			Trying is the first step towards failure.
406638642300727296	Psych2morrowmag	RT @Psych2morrowmag: #Melancholy, #Nostalgia and #Depression - http://t.co/s8vf2IMMh7 | http://t.co/orclfpko4C | #Memory | #Pain | #Poetry	30/11/2013 3:19:41 PM	Retweet	4	Melancholy Nostalgia Depression Memory Pain Poetry	Psych2morrowmag	Psychology Tomorrow	Open your eyes...	http://t.co/4yohZzGOo0	#PsychologyTomorrow explores the practice of #psychology as an #art, in all its complex possibilities... | http://t.co/6ICDGLVMlx | http://t.co/959DgsZqxO |
406198108574744576	picardonhealth	RT @picardonhealth: Toronto woman denied entry to U.S. after agent cites history of #depression http://t.co/lHu9GPgRjl via @torontostar	29/11/2013 10:09:10 AM	Retweet	10	depression	picardonhealth TorontoStar	André Picard		http://t.co/VMj9wZWseA	André Picard is the public health reporter at The Globe and Mail. I tweet on health policy, running and health journalism.
405849001544519680	fathers4equalty	http://t.co/pqR0FORfUP: Why #Depression is no joke when it comes to Aussie... http://t.co/9plKvgsZFO #Men'sHealth	28/11/2013 11:01:56 AM	Tweet	0	Depression Men		Fathers4Equality	Sydney	http://t.co/pqR0FORfUP	Ash Patil is President of Fathers4Equality Australia.
405264686808961024	OnlineTherapy7	Online Help for #DEPRESSION - Talk to a Therapist Online via Skype: http://t.co/rPwOiWstF4 via @youtube. Contact me now! Please RT!	26/11/2013 8:20:05 PM	Tweet	0	DEPRESSION	YouTube	Online Therapist	Louisville, Colorado	http://t.co/7gNj8EQd	Online Mindfulness Therapist via Skype for Depression, Anxiety, Addictions, Stress & Relationship Problems. Contact me today to learn more.
406686011872120833	MrsOdie2	So much to feel Thankful for, and you feel like an asshole because you're still unhappy. #depression	30/11/2013 6:27:55 PM	Tweet	0	depression		Mrs Odie 2		http://t.co/pf0m8GgM	Like you, only funnier.
406823741885128704	WilliamLanegPOL	#girls #pretty #society #so #true #ugly #arent #we #fake #depressed #depression #hate #how #i #look #beautiful http://t.co/vndInXUoaM	1/12/2013 3:35:13 AM	Tweet	0	girls pretty society so true ugly arent we fake depressed depression hate how i look beautiful		William Lane	Bloomfield Township	http://t.co/Olz92BRlmY	I just got cut off from red bulls WHO WANTS TO PARTY NEW YORK NEW JERSEY OR UPPER PENNSYLVANIA
407341455871455232	bmhmag	@AgainstSuicide such an accurate description of the often debilitating and very personal experience of #depression	2/12/2013 1:52:25 PM	Tweet	0	depression	AgainstSuicide	bmh magazine	worldwide	http://t.co/Q0F0ysaypq	the independent international magazine for anyone who cares about better mental health
408136430100426752	Buddle2	Getting darker and darker as I leave my house for work in the morning.. #depression	4/12/2013 6:31:22 PM	Tweet	0	depression		Mark Buddle	Liverpool		Official Twitter account of Mark Buddle, gifted football manager and part-time Uni student.
405837312958808064	apoemaday	@Leasing4seniors #Care 4 #Elders? I did this -What do you think? http://t.co/gWDw8nginx Ask your #library for #ADayInALife #depression	28/11/2013 10:15:30 AM	Tweet	0	Care Elders library ADayInALife depression	Leasing4seniors	Jean Mercier	Montreal, Canada	https://t.co/qPjoZ6vuOc	+ 1,440,000 FANS on FB! Love Notes for the Soul since 2003! © Poems by Jean Mercier. Photos by Junichiro Kuniyoshi. Books now available! ReTweet with love!
406283734540103680	jfj_456_go	Starting to feel lonely. #emo #depression	29/11/2013 3:49:25 PM	Tweet	0	emo depression		JR Fortune	803/864	http://t.co/x4MJNyuoPY	This is the life of a single sinner that have been saved by the blood of Christ. Poet, Songwriter, Artist & Believer. (Romans 6:6) #SBP #456 #jfj
406436995842715648	athenagdlyt	RT @athenagdlyt: 5 Natural Ways to Effectively Fight Depression: http://t.co/nWWetHqKug #depression #psychology #counseling	30/11/2013 1:58:25 AM	Retweet	2	depression psychology counseling	athenagdlyt	Athena Goodlight	Philippines	http://t.co/yhHNMTO8Qs	A freelance writer and a social media butterfly.
406886715597791232	RecoveryLetters	RT @RecoveryLetters: You are more important than the depression. #depression	1/12/2013 7:45:27 AM	Retweet	2	depression	RecoveryLetters	The Recovery Letters	UK	http://t.co/Xaf14LTiK4	The Recovery Letters publishes letters from people recovering from depression, addressed to those currently suffering
406907640212914176	RegenceIdaho	RT @RegenceIdaho: Parents...do you know if your teen is suffering from #depression, and how to treat it? http://t.co/FWQJhDMhzF #AskTVDr	1/12/2013 9:08:36 AM	Retweet	2	depression AskTVDr	RegenceIdaho	Regence BlueShield	Lewiston, Idaho	http://t.co/xPTYvE3n6L	Serving Idaho plus Asotin & Garfield counties in WA. Connecting you to resources for your health and wellness as we work together to transform #healthcare
406886171193909249	KingdomServants	How to Hold on When Everything is Shaking- Reaching for bedrock to keep from going in #depression http://t.co/v665ZNOQUX #Grief #Despair	1/12/2013 7:43:17 AM	Tweet	0	depression Grief Despair		Kingdom Ministry	Global	http://t.co/NaqftK4Z5z	A Kingdom Ministry Portal to Train,Teach, Strengthen and Bless His servants doing the Lord's work in the 21st Century. We are a Apostolic & Prophetic Company
405765578335744000	AprilVowels	#soml #this #is #me #girl #fighting #against #depression #ohwell #liveinthemoment #followme… http://t.co/bW0OlLede2	28/11/2013 5:30:27 AM	Tweet	0	soml this is me girl fighting against depression ohwell liveinthemoment followme		april vowels	Niagara Falls		3 BIG rules: 1. dont b hatin' on the Biebs 2. ALWAYS cheer for the Packers 3. Downers: don't waste my time 3 :) :*
405409648930750464	Ms_Prettybitch1	Smh this shit is unreal all I wanna do is sleep now #depression	27/11/2013 5:56:07 AM	Tweet	0	depression		December 16th	Danville		grown & on my way to the top loving my babys father : expecting a newborn June 22 2014 ✌✨instagram- bryonarene. ❕✨
406866270814879744	MindfulTherapy4	Online Help to Control #Depression - Talk to a Therapist Online via Skype: http://t.co/zYOTx0ruVy via @youtube. Contact me now! Please RT!	1/12/2013 6:24:12 AM	Tweet	0	Depression	YouTube	Mindfulness Therapy	Boulder, Colorado	http://t.co/Zdqq3ID5Zk	Online Mindfulness Therapist via Skype - providing Professional Online Therapy for problems with Anxiety, Depression, Stress, Addictions and Relationships.
406435423984967680	amilllionBUX	@MorganBALROG #depression #killme #iwanttocry #maybesobbing #WHY	30/11/2013 1:52:10 AM	Tweet	0	depression killme iwanttocry maybesobbing WHY	MorganBALROG	Aimee Bux			pizzaholic and cheap wine aficionado. audrey hepburn in training. yankees number one fan.
406357858088144896	CharitySANE	RT @CharitySANE: A favourite thought for the day: #mentalhealth #BlackDogCampaign #oneinfour #depression #MHUK #1in4 #MH http://t.co/wwHIVC…	29/11/2013 8:43:57 PM	Retweet	26	mentalhealth BlackDogCampaign oneinfour depression MHUK 1in4 MH	CharitySANE	SANE	London, UK	http://t.co/OVkNj7KGam	SANE improves quality of life for anyone affected by mental health problems, including family, friends and carers
406642856195923968	Fatesgates	Depression sucks That's why most guys should be happy.. #dirtythoughts #depression #dirty #sucks	30/11/2013 3:36:26 PM	Tweet	0	dirtythoughts depression dirty sucks		Benjy Ban Quan
406145969680416769	MindfulnessMan	Online Counseling Therapy for #Anxiety & #Depression : http://t.co/oeosdsO4Rn via @youtube. Contact me now! Please Retweet!	29/11/2013 6:41:59 AM	Tweet	0	Anxiety Depression	YouTube	Mindfulness Therapy	Boulder, CO, USA	http://t.co/zfZYQccFaI	Online Mindfulness Therapist, Teacher and Author of 'The Path of Mindfulness Meditation' - the application of mindfulness for healing emotional suffering.
405347376548044800	tonylobl	RT @tonylobl: Tx! RT @Steph_and_Annie: Struggling to find a 'light beyond #depression'? Can spiritual joy cut through? @tonylobl http://t.c…	27/11/2013 1:48:40 AM	Retweet	1	depression	tonylobl Steph_and_Annie tonylobl	Tony Lobl	London	http://t.co/5jHKpHAPmX	Spirituality and health blogger - Indy, HuffPost UK and others/ Christian Science - practitioner & media/legislative liaison for UK/Eire/Euro institutions
407270571010187264	sadsuicidalgirl	RT @sadsuicidalgirl: Have you? Xxx #depression #suicide #selfharm #sad #dead http://t.co/RI8AuFx4Dq	2/12/2013 9:10:45 AM	Retweet	15	depression suicide selfharm sad dead	sadsuicidalgirl	sadsuicidalgirl			self harmer, deep depression, bulimic and just wanna be dead right now! Always here to talk if anyone needs it! I love u all! Dont cry tonight xxxx
405354107084742656	Acbroken7771	Always look out for others even if you have your own world #quote #life #depression #love @TheseDamnQuote #heart http://t.co/1vepbG3GPK	27/11/2013 2:15:24 AM	Tweet	0	quote life depression love heart	TheseDamnQuote	Adam Clark			Lyric writer, Singer bit of guitar. Lyrics is where i stand out with the amount of emotion or even just struture. Solo artist here and there, casual gamer ;) X
407337877857914880	kariannw96	RT @kariannw96: No sleep tonight. #depression	2/12/2013 1:38:12 PM	Retweet	2	depression	kariannw96	Kvr! Vnn Cvu53y	with my fiancé	http://t.co/qVejpwkEGf	2/14/13 @jack1frost1
406618518172348416	MindfulTherapy4	Online Therapy for Depression via Skype - Online Therapist for #Depression : http://t.co/vTfQviRc5u via @youtube. Contact me now. Please RT!	30/11/2013 1:59:43 PM	Tweet	0	Depression	YouTube	Mindfulness Therapy	Boulder, Colorado	http://t.co/Zdqq3ID5Zk	Online Mindfulness Therapist via Skype - providing Professional Online Therapy for problems with Anxiety, Depression, Stress, Addictions and Relationships.
405744559008673793	apoemaday	@wiltonlibrary #Care for #Elders? I did this - What do you think? http://t.co/gWDw8nginx Offer #ADayInALife to your members. #depression	28/11/2013 4:06:55 AM	Tweet	0	Care Elders ADayInALife depression	wiltonlibrary	Jean Mercier	Montreal, Canada	https://t.co/qPjoZ6vuOc	+ 1,440,000 FANS on FB! Love Notes for the Soul since 2003! © Poems by Jean Mercier. Photos by Junichiro Kuniyoshi. Books now available! ReTweet with love!
406522306706829312	Daniel_L_Baker	RT @Daniel_L_Baker: If you care about what other people think you will always be their prisoner. #mentalhealth #depression #anxiety #bipola…	30/11/2013 7:37:25 AM	Retweet	3	mentalhealth depression anxiety bipola	Daniel_L_Baker	Danny Baker	Sydney, Australia	http://t.co/oi3n2PobPL	Author and founder of the Depression Is Not Destiny Campaign. Get your FREE copy of my tell-all memoir, The Danny Baker Story, at my website today.
405403267896983552	agapespirit	#Abraham could have given up to #depression when Isaac wasn't forth coming but He staggered not at God's promises through unbelief!#SamDiary	27/11/2013 5:30:45 AM	Tweet	0	Abraham depression SamDiary		Samson Ajilore	Nigeria, Africa	http://t.co/2Q9MtlLXBm	President of SAWO, a ministry dedicated to advancing God's Kingdom on earth through Agapé Word, Worship&Wonders. Snr Pastor of Agape Church Of The Supernatural
406370710437654528	only_786	#Pearl, associated with emotional balance and enables us to overcome all forms of #depression http://t.co/SBinOH33Fc http://t.co/m4CFLo1ZQg	29/11/2013 9:35:02 PM	Tweet	0	Pearl depression		Only786		http://t.co/h7bIM0lCny	Only786, bringing you a range of exquisite Islamic products right to the comfort of your home.
406152892648017920	Daniel_L_Baker	RT @Daniel_L_Baker: If you're suffering from #depression or know someone who is, then download my FREE e-book at http://t.co/oi3n2PobPL htt…	29/11/2013 7:09:30 AM	Retweet	5	depression	Daniel_L_Baker	Danny Baker	Sydney, Australia	http://t.co/oi3n2PobPL	Author and founder of the Depression Is Not Destiny Campaign. Get your FREE copy of my tell-all memoir, The Danny Baker Story, at my website today.
405096674898759680	NAMICommunicate	RT @NAMICommunicate: Rat Study Aids Understanding of #Depression Treatment http://t.co/MeQQkHsV5c	26/11/2013 9:12:28 AM	Retweet	6	Depression	NAMICommunicate	NAMI	Arlington, Virginia	http://t.co/zha15RDgBP	The National Alliance on Mental Illness. Find Help. Find Hope. HelpLine: (800) 950 - NAMI
405189901005500417	BHicksYoooo	Sleep whats sleep? #Depression	26/11/2013 3:22:55 PM	Tweet	0	Depression		Brandon Hicks			Turn up on that Good Kush:)
406570885823623168	Yolmarin	5 Reasons You’re Feeling More Emotional Lately: Everyone has off days. You may... http://t.co/aVi0zX6M9z #BrainandBehavior #Depression	30/11/2013 10:50:27 AM	Tweet	0	BrainandBehavior Depression		Yolanda Marín	Caracas, Vzla | Tenerife, Esp	http://t.co/byxKTudY3A	Escritora, Creativa y Psicóloga, nos conecta con nuevas posibilidades para desempeñar nuestros roles de vida desde lo valuable.
405338124831563776	BubblyTiffanya	I'm hurting in the inside right now #depression	27/11/2013 1:11:54 AM	Tweet	0	depression		Lovatic For Life✌			Girly Girl, Vegetarian, Park HS, Very Athletic #Rusher, #Klainer, Took Part In #AllyWeek #JonasBrothersPleaseComeBack #Gleek #StopBullying, Single Pringle✌
405329195095437312	DeedaPayton	RT @DeedaPayton: VIDEO: Medicare in #Texas to Start Covering Magnetic Pulse Treatment for #Depression. Starts Dec 5th. http://t.co/yxoFV2rD…	27/11/2013 12:36:25 AM	Retweet	2	Texas Depression	DeedaPayton	Deeda Payton	Austin, TX	http://t.co/osmzuzjw8s	Morning Anchor for KEYE-TV from 5-7am! Overtweeter Extraordinaire.
405849144029241344	Petrabilities	1 patient experienced major #depression and 2 patients experienced #photosensitivity reactions. A total of 4... http://t.co/OiajmNmdyV	28/11/2013 11:02:30 AM	Tweet	0	depression photosensitivity		Hepatitis C Global	Vancouver, BC	http://t.co/xTmtQJ8H12	Hepatitis C Global Initiatives Founder/CEO, Public Speaker, Support Therapist, Author of 11 Vials, Artist www.youtube/petrabilities.com #Hepatitis C, #Hep C
407315203966005249	MindfulTherapy4	Online Cognitive Therapy (CBT) for #Depression. Talk to a Mindfulness therapist via Skype. http://t.co/HDbjkrmmzC. Email me. Please Retweet!	2/12/2013 12:08:06 PM	Tweet	0	Depression		Mindfulness Therapy	Boulder, Colorado	http://t.co/Zdqq3ID5Zk	Online Mindfulness Therapist via Skype - providing Professional Online Therapy for problems with Anxiety, Depression, Stress, Addictions and Relationships.
405170377384402944	SkypeTherapist	Online Counseling Therapy for #Anxiety & #Depression - http://t.co/tEqsv1PRrC via @youtube. Contact me! Please RT!	26/11/2013 2:05:20 PM	Tweet	0	Anxiety Depression	YouTube	Online Therapist	Boulder CO, USA	http://t.co/A3Ve4p9NRS	Professional Mindfulness Therapist, Teacher & Author - Online Therapy via Skype for Anxiety, Panic Attacks, Depression, PTSD, Addictions & Emotional Well-Being.
405673743940612097	enituzanp	Two groups #depression of 25 patients were formed, the first one with http://t.co/nthTdrbENd #belle	27/11/2013 11:25:32 PM	Tweet	0	depression belle		enituzanp	Bakersfield		My clothes still smell like you, and all the photographs say that you're still young.
405101675092135936	Jen1McFall	"Just as the caterpillar thought the world was ending, She awoke a butterfly" #Depression #Positivity #Motivation http://t.co/jtOI8zxpAO	26/11/2013 9:32:20 AM	Tweet	0	Depression Positivity Motivation		•☆º★Jen McFall ★º☆•	Bristol, UK		Single mum overcoming illness & all life's shit. #AspiringSkinnyChimp #FitFam sw:134lb cw:114lb IG: jenmcfall81
405387362144124928	_zankel	http://t.co/a7ecVMtBl2 Exercise while depressed. Good advice! #depression	27/11/2013 4:27:33 AM	Tweet	0	depression		Ayelet Zankel	Israel
405146972723490816	SailorsGirl14	I feel as if i'm not going to go anywhere in this world. #depression	26/11/2013 12:32:20 PM	Tweet	0	depression		Sailors Girl			i am a 17 year old who fell for her best friend who is 20 and even though i never see him because we live states away but i'd do anything to make him happy S+K

## Sheet: Schizophrenia users 10%
Username	Name	Bio
EMA_News	EU Medicines Agency	Latest news from the European Medicines Agency, the European Union agency responsible for the evaluation and supervision of medicines. RTs ≠ endorsement.
Healthy_Minds	Healthy Minds Canada	A national organization raising funds to support mental health and addictions research, converting the knowledge gained into publically accessible resources.
TaylorGillin	Taylor Gillin	KALOPSIA: The delusion of things being more beautiful than they are. I just really want to see Grimes live. I'm beyond sarcastic.
TrishHurtubise	Trish @ MHT	Mental Health Talk (MHT) is a site of #mentalhealth stories by real peeps full of wisdom & inspiration. Always looking for guest bloggers w/ lived experience.
artautism	The Art of #Autism	Debra Hosseini storyteller, art curator and blogger on autism, #Aspergers, #neurodiversity, #creativity and the power of the human spirit
igygomen	igygomen	I am usually always singing about the same god damn person, so I'll love him forever, but you know, it's all good. - Lana Del Rey
mnt_schizophren	MNT Schizophrenia	The latest schizophrenia news published daily. Articles from research centers, universities and prestigious journals.
LightWounds	Light Wounds Movie	A feature film about a family's struggle when their son returns from the military and faces the onset of schizophrenia
BPoD_mrc	BPoD	Beautiful biomedical pictures every day of the year.
sceil	Scéil	Scéil is the 1st to offer individuals the chance to have a sample of their cells transformed into ‘induced pluripotent stem cells’ and stored for their lifetime
BCSchizophrenia	BC Schizophrenia Soc	The British Columbia Schizophrenia Society ( BCSS ) Helps people with schizophrenia & their families
jwharnisch	Jonathan Harnisch	Accomplished writer, producer and musician, I blog and podcast about mental health, inspiration and creative fiction.
EftiyTuano	Brian Carter	UX lead, IA, sometimes, INTJ, my life has subtitles, but I don't always know in what language,
MHTuz	#MentalHealth	Latest news about #MentalHealth.
TherapistTee	TherapistTee	Seeking to live life with #divine purpose & above the chaos. #Child #MentalHealth Therapist, Author, truth-seeker, family-girl, lover of solitude
AliRayHarri	Alice Harrison ❄	Just because I'm sorry doesnt mean I didn't enjoy it at the time
sfpodge	Patrick M.	Philly born n' bred, but livin' on the Left Coast. IP geek, voracious bookworm & a loyal little Kornheiser podcaster.
RavineshKumar	Ravinesh A. Kumar	Research Director @ConteChicago, autism/schizophrenia/conduct disorder genomicist, GxE, Board Member @AACTIONAutism, amateur photographer, Vancouverite
DymphnaRose	Linda O'Dell	Learning Life's a Journey, always trying 2B closer2 God. I love learning 2B Catholic, being RN, Family, Pets, #ArmyWives, Reading, Crocheting, wanna-B quilter!
CARBC_UVic	CARBC	Official account of the Centre for Addictions Research of BC at UVic. Facebook: http://t.co/P58lAuh2hd Blog: http://t.co/UkRA54yZRl
JunoJakob	Juno Jakob	Film Watcher / Film Producer at 'Straw Lane Productions' ( Slaughter / No Direction Home / People Call Me Crazy) / Paranoid Schizophrenic
NAMIMass	NAMI Massachusetts	A vital state resource to individuals and families facing the challenges of mental illness, providing free family-based education and family and peer support.
Daniel_L_Baker	Danny Baker	Author and founder of the Depression Is Not Destiny Campaign. Get your FREE copy of my tell-all memoir, The Danny Baker Story, at my website today.
missminibaby	Queenfifi	I came to conquer!
DGhariany	Diana Ghariany	Too much infomation is not good for your health! :)
MeganOCO	Megan O'Connor	Clinical Research Business Development

## Sheet: Depression users 10%
Username	Name	Bio
B1ackComet	Jose	Life moves fast. If you don't stop and look around once in a while, you could miss it.
Chon_95	Fernando Acosta	Trust No One
stepasidewhore	Giselle.	i'm weird.
ChrisJeub	Chris Jeub	Author, Blogger, Entrepreneur, Debate Coach, Father of 16 Children.
miepsja	Mischa Selis	Psychiatrist, MD, and mindfulness trainer healing doctors and hospitals with a personalized soul-mind-body approach. Dedicated to the one who has found me.
NAMICommunicate	NAMI	The National Alliance on Mental Illness. Find Help. Find Hope. HelpLine: (800) 950 - NAMI
JoanLandinoSays	Joan Landino	Joan Landino is a Vegan Life Coach and Mental Health Therapist intent on removing the social stigma of mental illness.
memacushla	Macushla
normalight	NormaLight, MSW, MA	#Healing the heart, How to do #meditation, #self-help #book for depression, #Intuition, dealing with #anxiety, how to overcome #depression, #psychotherapist
WatkinsEmpowers	Watkins Empowers	Counseling, Coaching & Consulting
fathers4equalty	Fathers4Equality	Ash Patil is President of Fathers4Equality Australia.
guerson4kwrj	Emily Peregrino
PrendergastLj	laura prendergast
Wiley_Nursing	Wiley Nursing	Global resource for multidisciplinary publications for nursing students, educators, practitioners and researchers in all areas.
AntiStigma	Anti Stigma	Helping to end the stigma on mental health, by spreading the word one tweet at a time #endstigma #MentalHealthAwareness
scottlarsonclc	Scott Larson	25+ year Wellness Professional - Tweeting about Exercise, Diet Lifestyle Change and Other Healthy Things
sueindia	Sue Bowden	Mad granny, traveloholic, sports nut, food freak, couch potato, lifelong Spurs fan (and have the grey hairs to prove it)
SlamJam2012	Edward Crean Jr.	I'm an honest and caring guy and i try to treat everyone i meet with kindness and respect,i'm currently single and i have good days and days from depression.
natalie_rodri	Natalie rodriguez	#element #hispanic #god #love
TAWOP	Justin Marley	UK Psychiatrist, Tweeting About Psychiatry, Science etc. See here for COI http://t.co/6YfTnFrIkb - Views here are my own, YouTube http://t.co/DnDIxcQcfz
AutistLiam	Liam	Me: disabled, autistic, white, queer, male, trans, Jew-in-progress, British, survivor. I tweet stuff likely to trigger many. Not always clearly warned for.
blondebreeee	Aubrey Bertanzi	Just a girl living in suburbia. Sleep deprived, tough exterior, soft and mushy inside.
MentalHealthRes	MentalHealthResource	We aim to provide information and support to help you overcome challenges and discover mental wellness.
DrDeeRajska	Dr. Dee Rajska	Clinical psychologist in St.Catharines, Ontario. Passionate about helping #military #veterans with #OSI #PTSD. Check out my blog at http://t.co/PX83NGQTlp
EquilibrioLife	Equilibrio Life	Equilibrio Life is a division of Equilibrio Coaching Company, facilitating personal life & well-being services for individuals, couples, & families.
Jessi3burnsred	J e s s i e	3/28/13 | Adventure is out there |
AngelOlives133	Angelique Olivas	HAI!! I'm Angelique ~call me angel or meh name idc~ follow me and i will follow back! huge AA and BMTH fan
farmradio	Farm Radio Intl	A Canadian not-for-profit organization working in partnership with 460+ radio partners in 38 African countries. Donate to support us: http://t.co/4DhgXX9Goy
MohammedHamdyy	Mohammed Hamdy	I want to do nothing in this world but create. evolve. change. grow. inspire. give hope. love. be an example...LONDON IS THE PRIDE ♥, Architect
sandhu_teji	Tejindar Sandhu MD	Enhancing the quality of life through improved mental health, in San Francisco and its Peninsula.
CYMCharlie	Charlie Wardle	I'm the founder of charity 'Climb Your Mountain' (CYM) Aim to help anyone who has their own personal mountain to climb in life. Health & Wellbeing.
Bethany1202	Bethany Marsh	#Vegan #animal lover who likes rock music in search of that winning lottery ticket... Oops, I've already found him. It's not about #money, it's about #love. XO
binkytoes	Apparent Aphasia	When in Twitter Jail, alt acct is: @BinkyTooo. Love food, comedy, nerdy stuff, my dogs. You live for the fight when it's all that you've got. - @bonjovi
LiamPhotog775	Liam	Photographer. Tattooed & Pierced. Blue Mohawk. Always learning, always evolving. Transman.
recoveryblog	Addiction Recovery	The Addiction Recovery Blog offers insights on sobriety & recovery. It's a place where recovering alcoholics & addicts can help each other Live Life Clean!
DropWeightNow1	Michael Plante	Discover Amazing Weight Reduction Strategies today at http://t.co/jNFT8OEhVQ
JeffPfiefer	Jeff Pfeiffer	Social Drinker
Bodyfatcoach	Workout Solutions	Personal training, health and fitness consultant
lavieencmyk	Fernanda Gasparin	50% Geek 50% Party Girl. Creative/Art Director looking for a job. Teach me something/ask me anything.
coCatarsis	Louie Ramos	Trastorno Mental. Provocateur PhD. Satire & Sarcasm: Only way to make sense of this absurd banana republic
nialljerking	be my 1/5 niall	❤ The boys ruined my life ❤ Follow my instagram (i hardly use it) I_WANT_NIALL ^^ 0/5 is depressing.
SarkisFamilyPsy	Sarkis Family Psych	We provide the best possible psychiatric care to the children and families of north-central Florida.
CutsOfFeeling	b r o k e n *	15, Girl, Bisexual, Depression, Suicidal, SH, PTSD, Seriously obese - I want to see my bones.
DavidGratzer	David Gratzer	Physician & Psychiatrist, Author, International Man of Mystery
HeartDiseases	Everyday Health	Follow @HeartDiseases for the latest news and information on living a heart-healthy lifestyle, straight from the editors of @EverydayHealth.
cannibaljp	Cannibal	Cannibal, in so many ways... @cannibal on Instagram - check it out, let me know what you think.
covohusyn	covohusyn
MEMinerals	MotherEarth Minerals	Mother Earth Minerals offers truly unique and cutting edge nutritional supplements. Superior Absorption, Superior Quality, Superior Health! (866)-989-9876
RelaxMind123	Mindset Hypnotherapy	Hypnotherapist, Helping with Weight loss, Depression, Phobias, Quit Smoking, Stress and many more.
yogisonia	Sonia Sharma	Yoga Expert,Community Manager for http://t.co/VxImIqti, Love Yoga! Yogini Follow Us @fitnessrepublic
SarrahEssam	SarahEssam.
susanallenlmft	Susan Allen LMFT	Psychotherapy | Mindfulness | Life Transitions | Infertility | Pregnancy | Relationships | Licensed Marriage & Family Therapist MFC 51679
Yolmarin	Yolanda Marín	Escritora, Creativa y Psicóloga, nos conecta con nuevas posibilidades para desempeñar nuestros roles de vida desde lo valuable.
Servants5	Apostolic Servants	Building the Global Body of Christ by Serving His Leadership. We are a band of brothers and sisters who love Jesus and one another. Chief Editor @JoseBosque
iamsonnyellar	Sonny Siano Ellar	Works Abroad, Happy Cook, Taking Baby Steps to Entrepreneurship, Bibliophile, Photography Enthusiast http://t.co/WzI7kxNCMD
Bethanybellexo	Bethany Jodoin
craig_denholm	craig denholm	Obsessed is a word lazy people use to describe the dedicated
JoejoeTahir2	MoreHarmMade	Communication expert. you cannot not communicate Lyricaleminence
drflanders	Dr. Daniel Flanders	Dad. Husband. #Pediatrician w/special interest in #PrimaryCare, #nutrition, #obesity, feeding problems & #EatingDisorders. I work at @kindercarepeds & @kidecare
Dava73	Dava Roopchand	Everything is temporary.
enlyterx	EnlyteRx	By prescription only, Enlyte contains DeltaFolate, for safe and complete treatment of depression, without the side effects. Pregnancy category A.
fautedemieux73	Andrea	Hi! I &hearts; music, books, writing, chocolate, art, wine, travel & photography. You won't have a story without turning pages. ~ Gavin DeGraw
Nature_Spirits	Nature Spirits Speak	Nature Spirits share the secrets to living an extraordinarily prosperous life.
Scott1984_FP	Scott A J Reynolds	I SUFFER #RSD / #CRPS & Wrist Instability, #Depression & #BPD. U MUST BE 16+2FOLLOW ME. I'M OPEN & TALK ABOUT MY #MENTALHEALTH / LIFE :) :/ :( I'm #Gay :)
DAsLife84	Debra A.	I'm a major people person. I am a poet. I have 2 blogs. http://t.co/yLZAAg54T7
Getreil1991	Rick Neil	•Live by what you say not by what you hear •make the best use from what you have #fortunate Instagram~ GETREIL1991
mnt_depression	MNT Depression News	The latest depression news published daily. Articles from research centers, universities and prestigious journals.
BestTherapy4U	Online Therapy	Professional Mindfulness Therapist. I provide Online Mindfulness Therapy via Skype for Depression, Anxiety, Addictions & Relationship problems.
LouisianaPainDr	Louisiana Pain	Louisiana Pain Specialists - Louisiana's Premier Pain Management Clinic Specializing in Treatment for Chronic & Acute Pain Conditions.
mssocietyuk	MS Society UK	The UK's largest charity for people affected by MS.
WhiedaadMoerat	-Catt♡∞	You visiting my profile ? Aww .
bigbobtait	Bob Tait	Digital Media Executive @safcofficial. Singer in a band. Lover of music, the outdoors and my lady. Oh, I enjoy the odd pint too.
PtvSws33	Pierce The Sirens	Pierce The Veil and Sleeping With Sirens are my life...
capricat22	Capricat22	Single/Female/Patriot/Nursing/Ohio
amoghjayavant	Amogh Jayavant
atakan_ekiz	Atakan Ekiz	PhD candidate in Oncological Sciences. Interested in cancer research, immunology , cancer immunotherapy
sadsuicidalgirl	sadsuicidalgirl	self harmer, deep depression, bulimic and just wanna be dead right now! Always here to talk if anyone needs it! I love u all! Dont cry tonight xxxx
StanleyIsDumb	Stanley Zhou	20; Chinese; Useless; Dumb. Diehard #Leafs and #Jays fan! Neurosurgeon's the dream; Med. School, at all costs.
Capn_Edward_EXV	Aladino Bahri	Music keeps me running. I play guitar and drums, as well as sing. Philosophy, the social, the literate arts.
mochuckmochuck	Maureen Chuck	A mature woman's strange erotic journey from Catholicism to atheism via skepticism
TatsuyaSasu	Crystal	Xbox Live: TatsuyaSasu PSN: TatsuyaSasu Steam: Tatsuya22
TJA_evonet	Tony Jameson-Allen	A founding director of The Sporting Memories Network CIC
EmilyStox	Emily Stox	i'm emily, who are you ? #stockings #heels #fashion
SelfHelpTeam	Self Help Notts	Provide specialist skills and resources to self help groups and stakeholders, across Nottinghamshire and nationally #SelfHelpWorks
Treatment4u	Wellington Retreat	The Wellington Retreat assists people from all over the world with drug addiction, alcohol addiction or a mental disorder in conjunction with the addiction.
eileeve	Eileen Eva	Health, wealth and beyond.
mcbernard	Marie Claude Bernard	Team Lead, External Communications at @UbisoftMTL. Former Director of @MIGS__. Opinions are my own.
Cheyenne_Lecter	Chey	i am a loser sooo follow me? :)
AmandaGreenUK	Amanda Green, Author	Author of #Memoir #MyAlienSelf my journey back to me and sequel '39' Mental illness Anti-stigma Advocate.BPD/depression/OCD recovery.Save Orangutan #Cat owner
muckedupkid	ugly.worthless.noone	so far from normality..please help me..relatable tweets #selfharm not proud.. #OCD #ABUSED #depressed #fakesmiles #suicidal #givenup ask for a #followback
PsychAlive	PsychAlive	PsychAlive offers free psychological resources and information from experts in the field of psychology.
TeamFitality	Fitality
GrassrootsSP	Suicide Prevention	Supporting communities to prevent suicide, one life at a time. We teach suicide prevention skills to community members & professionals. Not a crisis service.
ExeterTown	Exeter Town	Exeter City is such a beautiful place - Old Exeter Town is full of history - #Win a holiday in Exeter for just a penny - see our profile link for details
BodyshotPT	Leanne Spencer PT	Highly Qualified Personal Trainer | Lifestyle Coach | Boxer | Runner | Business Owner | Mission: to promote good health to all my clients.
ssnmentalhealth	SSNMH	South Staffordshire Network for #Mental Health The Service User's Network for people have their say about local mental health services.
LaneaBittaye	lanea bittaye	revert mom of two, poetry, blogs, random comments, funny and cool stuff #wii #humour #life
_CHKD	CHKD	CHKD is VA's only freestanding children's hospital & the region's most trusted name in pediatric care. Follow us for the latest on kids' health & hospital news.
AcornProjectUK	The Acorn Project	From little acorns grow mighty Oak trees...
Christian_Reads	Christian_Reads	The best Christian books and ebooks from traditional and indie authors!
Spirit_Fountain	Spirit Fountain	Be the YOU you always dreamed of! Positive thinking, self help, inspiration, motivation, personal growth, happiness and success.
LindsSE2	LindsSE2	#TVD #PLL !
parsimoniousp	Parsimonious Pash	I'm not you're average girl; I'm Wonder Woman! I'm disabled, work full-time & manage the household all while finding time to blog. PR Friendly.
theoffparent	The Off Parent	I’m a mad, joyous, hyper, renewed, starting over, alone, hopeful, depressed, divorced, and this is my rant. I'm the *off* parent, um, yeah, singleparent, dad
bookworm_fittie	Bookworm Fittie*	Caribbean Girl. Brainiac. Volleyball. Golf. Model. #Fitfam. #SelfieQueen Avi et header c'est moi.
RegenceUtah	Regence Utah	Utah's oldest #healthcare plan, connecting you to news and resources for your health and well-being as we work together to transform healthcare.
AjahmedAhmed	Jameela Ahmed	Passionate about justice & rights of women. Wanting to connect with like minded people. Love for All, Hatred for None
emilygoldfuss	Emily Goldfuss	Life's a journey, not a destination.
PilatesFR	PilatesFR	Official account of @fitnessrepublic Pilates Section,supervised by @pilateslaurah
PootleNorth	PootleNorthumberland	Saved from the brink of insanity through photography, returned from the Loire, to the UK finally stronger and happier! Consultant in Tourism and Nordic Walking!
BecLeeSteere	Rebecca Lee-Steere	Scientist. Swordswoman. Lover of large dogs.
RegenceOregon	Regence BCBS Oregon	Oregon's largest nonprofit health plan, connecting you to news & resources for your #health and #wellness as we work together to transform #healthcare.
tonylobl	Tony Lobl	Spirituality and health blogger - Indy, HuffPost UK and others/ Christian Science - practitioner & media/legislative liaison for UK/Eire/Euro institutions
tronmade	chose	welcome to a higher ground ..♦️
MindBodyMed	CenterMindBodyMed	We combine modern science and wise tradition to create a powerful new medicine centered on a simple concept: Self-care.
That_Jeff_Guy	Jeff Guy
Hermit_Mode5	Hermit Mode	I tell it how it is. I wont hold back..
Stella4Health	Stella Jones
healthythinker	Jane Sarasohn-Kahn	Health economist, advisor, consumer health advocate, user-centered design fan
Jazzie_Jeff_18	Jasmine Lynn Gregory	love short kids my age! and love my bfflsxoxo :* follow for follow
pinkbritbritt	Brittany VanCisco	pink, sparkles, and everything Disney :)
therealgenuin	Rosabel Velazquez	I want to be more than just famous . I want to be known .
cherylbenson	Cheryl Benson	M.E./FM 1991 survivor: repeated brain & body damaged, dystonia from meds fighting 4 my life & honest neurological medical care denied since 2003
todaysnote2self	Today's Note to Self	Spiritual messages through Nature
APEAL_Lab	Ian Colman	Tweeting about epidemiology, psychiatry and public health from the University of Ottawa
VitaminDCouncil	Vitamin D Council	The Vitamin D Council is a 501(c)(3) nonprofit organization, working to educate the public on vitamin D, sun exposure and health.
thesleepdentist	Kent Smith	I am a dentist with an interest in saving lives and marriages through better sleep. Diplomate of the American Board of Dental Sleep Medicine.
TraceyWiggs14	Kenny's No1 Fan ❤️	@Kennygoing2Mars is my man ❤️Love all animals. ❤️Love cute, funny pics, I tweet the occasional naughty pics, if offended, I apologize ❤️Live, Laugh and LOVE ❤️
RecoverySI	RecoverySI	Bridging the gap between treatment and recovery. Our mission is simple: We want treatment to work better! On Facebook: http://t.co/Jvgda5VjgX
claireisaboss	clurr	i like food and hockey.
NELLIE__BEEE	Chanell	Lost Soul.
sandiegopsychol	Dr. Joanne Wendt	Helping to enhance and enrich your self, your relationships, your life! Connect with me on Facebook to learn more: http://t.co/lgi0M7W6oN
worthlesssmiles	worthless☠	☹ADHD,bipolar,depressed,repressed emotions,anxiety,anorexia,suicidal.☾Days clean: 0✄ Any girl or any boy won't date me or love me for who I am so I'm a loner.☹
AFGSupport	AFG	Alternative Futures Group is a large charity based in NW England providing person-centred support to adults with learning disabilities & mental health needs.
bigislandtlc	Addicted to Recovery	Living A whole new life - Sober - Love to talk sobriety! #xa #recovery #sober
alifeofgreen	Fei Mok	#Wellesley '10, #QWOC, #AsianAmerican, #gaysian, #environmentalscience, #sustainableag, #foodjustice, #socialjustice, artist, musician, explorer, activist.
BeverleyGlazer	Beverley Glazer	I love helping people tired of self- sabotaging with #food, unhealthy #habits, bad #relationships & #addictions. Untwist your thinking & live!!
fionalander	Dr Fiona Lander	MBBS(Hons)/LLB(Hons). Medical Doctor | Lawyer | Human rights and health law consultant | Singer | Hopelessly addicted traveller RT≠endorsement, opinions my own
DominoMoore	Domino	Allotment newbie, wife to Adult 1, mother to Kids 1 and 2. Interest in NHS, research, make up and mental health issues. Big interest in sleeping.
DepressedBFF	DepressedSuicidalBFF	Depressed over grades? Suicidal over psycho girlfriend/boyfriend? Share hope encouragement. So Cheer Up! From BFF
piceno_65	Bernabe Piceno	You can call me Barney the dinosaur and I&#39;m from your imagination, aœS
AIMSEDUCATION	AIMS Education	AIMS Education is an allied health institute that was founded in 2004. We offer #career training and #certification for a variety of #health care professions.
EducatinEngland	Madeleine Matizcak	Teacher. Likes maths & cake & wine & cocktails. Dislikes pointless arguments.
KatCrochets	Kat Crochets	Competitive crocheting? Xtreme? Sounds sill, huh? Not as much as you'd think! Life is creativity, I have fun with it!
ricklondon	Rick London	✡ Married 2 @LeeHillerLondon Cartoonist/Writer/Designer. Kids Green Animals Causes. Offbeat Humor Cartoons. Founder Google #1 http://t.co/VYIUMPG9 & LTCartoons
SciPsy	R.C. Crane	Psych & Science news geek.
TrxRandy	Randy Fields	Trx Trainer, Coach, Body Worker, Photographer, Committed To Help People. Make Your Body Your Machine
ezdoctorsinc	E-Z Doctors	24/7 on-demand access to doctor care via telemedicine & much more. Get your 30-day free trial! Visit our website or call: 1.800.594.3465
headsupirl	Headsup Ireland	HELP FOR WHEREVER YOUR HEADS AT..
LaniOsterman	Lani Osterman	Keyboard player, voice actress, singer, dancer, except we don't dance here, so hello? - useless skill. Born in Montreal, PQ. LOVED my job until they said Tweet.
iqizabegu	iqizabegu
rachpower10	Rachael Power	Irish lady & Community Correspondent for @accountingwebuk, writing about accountancy and finance. Keen runner, reader, gig-goer and cake-eater.
FionaQuinnBooks	Fiona Quinn	Suspense writer with a psychic twist. Un-schooling mom. Adventure junkie. Book glutton. Chocolate-a-holic SinC FionaQuinnBooks on FB http://t.co/iJkW0wBWpF
Glennspillman	Glenn spillman	Author of the book 1000 miles from nowhere, Actor, Photographer, like to hang out, go to movies & go to live music. Like my book page, http://t.co/2lq5V59ZFk
CarmenWaterman	Carmen Waterman	Artist, Tarot Intuitive, Reiki healer, MBTI coach, creator of Rainbow Travellers Tarot helping others live their dreams. Chronic pain will not define my life
sarahyouna	sarah young	You can't judge a fish on it's ability to climb a tree
DrGlennMiya	Glenn Miya	Physician and Host of Smart Health radio show.
m_mckeough	Meaghan McKeough	Born and raised in Halifax. Mental health advocate with PFMH. 2nd year student at Memorial University of Newfoundland.
smorrison25	Stephen Morrison	You cant stop the waves but you can learn how to surf | 19 | Arkansas Tech University |
Kayleidogyn	Kayleidogyn	45yo single mum to son with physical disabilities & chronic health problems. Battling depression & recovering alcoholic. Why I swear so cunting much!
Cork_Hub	Cork Hub
MadwomanIsOut	madwoman	struggling with depression and personality disorder; check out http://t.co/88aEDuyvVe
NYUDocs	Doctor Radio	SiriusXM Satellite Radio's Doctor Radio Channel, powered by the NYU Langone Medical Center.
PaulBrook76	Paul Brook	Content & publishing manager @JRF_uk + blogger writing about #mentalhealth, fatherhood & birds.
RxWiki_Mental	RxWiki Mental Health	RxWiki is the home of the #DigitalPharmacist featuring the latest Mental Health info, news, and video content on a range of prescription and OTC medications.
ASHomecareCA	Lou Ann Mowry	All Seasons Homecare provides assistance to those who need help with everyday tasks because of illness, surgery, or chronic conditions
LDSLivingMag	LDS Living	#LDS Living complements your lifestyle, bringing you a values-based perspective on issues that matter and great ideas for enjoying life.
nonaxcin_corral	Nonaxcin Corral	Are You Mobile-Ready? Creating your site is fast and simple, and it&#39;s easy to edit or update any time,
Openyoureyes89	Amzie	Fibro sufferer, aiming to be well enough to work. BSc Clinical+Health Psychology, Passionate about music, clinical research and mental health.
Amerikanerle	Sarah Martinez	#Shiny #Happy
BlondeLondonMum	Cara	Mama of boys,wife,runner,insomniac,red wine lover.Juggling family with a PR/advertising job in property.A wise woman once told me..M is for mother,not for Maid!
DexedrineHCL	Everett
Esme_214	Shorty Love;*	taken by the best. Sergio& Esme 33 9/18/13 ^_^
sharoneden	Sharon Eden	Recover from depression sooner rather than later... And, for a daily dose of inspiration, sign up for my Bounce Back Prompts
militarypathway	Military Pathways	Not all wounds happen on the battlefield. Military Pathways provides free, anonymous mental health self-assessments for family members and service personnel.
atomicCatharsis	Kat Harris	psychology major, chorus student director, horse rider, boat sailor, crew coxswain, story writer, photo taker, school... let's not go there.
dalibologna	Dr. Merkwürdigliebe	Purity of Essence
nsunebailey	Nicole Sune Bailey	/*@elliottschoolgw Global Comm M.A. Candidate*/ if(peerPressure(Nicole)){Nicole.createTwitter(); print Nicole.getBio();}else{Nicole.socStatDown();}
AccountingWEBuk	AccountingWEB.co.uk	News and views from the editorial team at the UK's leading online community for UK accountants. Updated by @robertdlovell @johnstokdyk and @rachpower10
AllTheBestNews	AllTheBestNews	Bringing you All The Best News from all over the world. No personal opinions, no filters. Just the best pieces of news that we can find.
HealthWalkLead	Health Walks Leader	Walks Leader, Certified by Brighton and Hove City Council. All views, opinions & errors are mine. Very Proud Father of a Very Very Special Son x
taylahoranxo	tay	o hay
Red_Aliss	Charlene	Kept alive by: rock 'n roll, good boots, great books, and grand illusions. I write. I draw. I sing out loud. And I never refuse free coffee.
CSinMinnesota	Joel Magnes	Breaking free of limits! Blogging link between spirituality & health. Healing prayer practitioner. Minnesota Christian Science media/legislative spokesperson.
haykaypelz	Akinpelu	Global Public Health | Diabetes advocate | mHealth interventions specialist | Sport enthusiast | Loves #touring; #smart chats; #networking and #connecting |
margiezargs	margaret rose visser	Wife +Mom. Wellbeing enthusiast who believes in Jesus, encouragement, humour, relationships. Theologian Counselling Spiritual companion #spirituality
smallzieredblue	Lee Smallbone	Aldershot&Arsenal Fan Carpenter&Joiner @ThursleyCricket ClubSponsorship Coordinator&ownerOf #MASHUP @hashtagmashup1 CreativeColthing(coming2013)
VivaLaMooreAmor	Cataleya Flor	Determined to STANDOUT. Relationship Status=Committed To the Father in Heaven. Far from perfect but HE loves me flaws and all.
KarinMochan	Karin Mochan	Health and wellbeing magazine editor. Animal lover, keen foodie, part-time Scandi. Any views expressed here are my own.
badgalaimz88	ameelia taylor	im 24, full of life love music and watching films.
MRCS_Richard	Richard Carrington-S	Proceed with caution
SamanEvie	evie saman	My name is Evie but I go by Rose. I love shopping, going to the movies, and going to parties. Im a actress i do plays in and out of school.
SunriseSrLiving	Sunrise Senior Lvg	Sunrise Senior Living communities offer a full range of personalized senior living services.
Time4Recovery	Youth Mental Health	The Youth Mental Health Network brings together a diverse group of people who want to improve the mental health of young people. Tweets by @S_Amani
GNINetIllyria	Rich Santerre	We are the network that says 'Gni'! Illyria is the 1st cluster in the network that *is* Social Media. Power to the people? About time, we think. :)P
Self_Harm_	Stay Strong.	When it rains look for rainbows, when it's dark look for stars... :)
LiDiahann	Lisa Whitehouse	I'm Lisa! A Senior carer/drug administrator for old folks, bearded dragon owner, Mini driver, Plan B fanatic and an apparent Apple whore Follow Me! xx
frankparker	Frank Parker	Modest, Open Minded, Caring, Free Thinker, Writer/Poet, Atheist Peace Believer, Patriotic Englishman, & Honest Single Dad/Grandad Who Understands Mental Health!
Psychomasokism	Theworldbrokemyheart	I bitch about my life on twitter so if you follow me, enjoy the train wreck, if you don't, then what are you doing?
ifyjinamps	ifyjinamps	Just because you aren't where they are does not mean you don't have what it takes.
SolaFilm	Sola	The official Twitter account for the feature film 'SOLA'. A film about Mental Illness & Hope by @lukemordue through @morduepictures #AlwaysHope

## Sheet: LEVEL OF STIGMA
Stigmatising depression tweets
Doing this "Greatest Failure" journal assignment for class only makes me hate the direction my life has taken more... #depression #weak
Zoning out into tht dark comfort zone is easy but slowly everything stops growing.Time to snap out of it! http://t.co/iXDr5uArV5 #depression
RT @Justgetthehella: *watches She's The Man* - "I can't believe she's a psycho now..." #depression
Do you talk about #depression on an interview? It bothers me much, esp q-s like "why were you not working for half a year now" and ...>
Wish journos would understand pressure Doesn't cause #depression , depression means you can't cope with pressure.
The Jonathan #Trott story has highlighted #depression as an issue faced by seemingly strong personalities; but... http://t.co/7ASIatFOly
#depression is a crisis of confidence http://t.co/q3jumRiTZ9
Don't let your #ego get in the way of a life of #happiness. http://t.co/zR6OAhaTXc #gratitude #joy #depression
Joy is a state of being. It is a choice. http://t.co/8PfMla0KYm Choose #joy. #love #happiness #depression
Secrets to choosing happiness! http://t.co/4Xe5xdCULE #depression #selfesteem It is a choice.
#depression #fucklife #crazy #killyourself #crazy #whore #retard #idiot #psycho #horrible #dumb #stupid #bitch #emo http://t.co/aUr63r5ax8
Is your #suspicious nature causing #depression in you? http://t.co/ODqN1mN0CF
Jonathan Trott: a casualty of #cricket's cruel test of strength #depression http://t.co/Hu2oi8D31d
Great article in Forbes http://t.co/RvD4ScGp97 #mentalhealth #depression
#emo #goth #sad #argument #depression #nobody #cares #unwanted #crying #cry #shouting #weak #sorry http://t.co/j2Uyu6jtOF
Stigmatising schizophrenia tweets
The Schofield's are a family that make me feel grateful for my daughter #January #schizophrenia
@AlyssaMae21 geee I wonder who put that? Just tweeting myself. #schizophrenia
RT @AlyssaMae21: @AlyssaMae21 geee I wonder who put that? Just tweeting myself. #schizophrenia
These two shows on #TLC are crazy I couldn't even imagine! #Schizophrenia #Turrets
Going through my feed= thinking with other people's voices. #schizophrenia
Seeing these poor babies with these illnesses makes me want to hold my boys and thank god that they are healthy#elhamdallah #schizophrenia
Btw, Katie is my other personality #schizophrenia
This snow just makes me want to cry and go sledding at the same time for different reasons #schizophrenia
#Scientists #discover #gene that #predisposes #Ashkenazi Jews to #schizophrenia http://t.co/SKkJq0P4E2
laughing like a stupid while staring at the screen ! #Schizophrenia
Ah ah, twitter is asking me if I know myself... You know, I'm not sure ;-) #schizophrenia
Girl sitting alone wearing a hat saying "you can't sit with us" #schizophrenia
SCHIZOPHRENIA: MEDICINE'S MYSTERY - SOCIETY'S SHAME. MARVIN #schizophrenia http://t.co/BGIVJuSe2J
I was diagnosed with dementia praecox (#schizophrenia) 32 years ago. Sorry about my crazy tweets, I'm insane.
Getting ready to hang out with myself! #schizophrenia
@kellie_scanlon you were 4 people? #schizophrenia
The same people who criticize #Thanksgiving also criticize #Walmart for not giving its employees a day off on thanksgiving. #schizophrenia
The Hollow City - @TheDanWells (reviewed by John) http://t.co/ps9s3jqYuQ #horror #bookreview #schizophrenia #giantmaggots #realestate
I hate Sundays then I love'm #winter #schizophrenia
"what do you mean, 4am is a perfectly acceptable time to be awake?" NO it isn't. (I'll add #Schizophrenia to my list of ailments)...
"@QuotesInternet: #Writing is a socially acceptable form of #schizophrenia. - Doctorow, E.L. #quote" #psychology
Untreated #Schizophrenia Boosts Likelihood of Future Violence Among Prisoners http://t.co/vWlmtU6CQd
Untreated #Schizophrenia Raises #Risk of #Violence, Study Finds http://t.co/GSwcPgl05g #psychosis #criminal #crime #assault #murder #law
Study: Ashkenazi Jews genetically predisposed to schizophrenia #ashkenazi #judaism #schizophrenia #mentalillness #Faith
@richardrainey you realize that it looks like we are having a twitter conversation with ourselves. #schizophrenia
Rihanna gets along with the voices in her head #schizophrenia #helprequired
.@HebrewU 's geneticist Prof. Ariel Darvasi tells @Amirmizroch about #Ashkenazi #schizophrenia gene http://t.co/pISxxApCN4
RT @TLV1Radio: .@HebrewU 's geneticist Prof. Ariel Darvasi tells @Amirmizroch about #Ashkenazi #schizophrenia gene http://t.co/pISxxApCN4

## Sheet: Data validation
Content
Personal experience of mental illness
Awareness promotion
Research findings
Resources for consumers
Advertising
News media
Personal opinion or dyadic interactions
User
Individual
Organisation
Consumer
Advocate
Health Professional
Attitude
Stigmatising
Personal experience of stigma
Anti-stigma
Supportive
Neutral
Stigma type
Social distance
Dangerousness
Snap out of it
Personal weakness
Inaccurate beliefs
Mocking or trivialising
Self stigma
